1 **It Takes Two to Tango: Combining Conventional Culture with Molecular Diagnostics**  
2 **Enhances Accuracy of *Streptococcus pneumoniae* Detection**  
3 **and Pneumococcal Serogroup/Serotype determination in Carriage**  
4

5 Willem R. Miellet<sup>1,2</sup>, Janieke van Veldhuizen<sup>2</sup>, David Litt<sup>3</sup>, Rob Mariman<sup>2</sup>,  
6 Alienke J. Wijmenga-Monsuur<sup>2</sup>, Paul Badoux<sup>4</sup>, Tessa Nieuwenhuijsen<sup>1</sup>, Rebecca Thombre<sup>3</sup>,  
7 Sanaa Mayet<sup>3</sup>, Seyi Eletu<sup>3</sup>, Carmen Sheppard<sup>3</sup>, Marlies A. van Houten<sup>5</sup>, Nynke Y. Rots<sup>2</sup>,  
8 Elizabeth Miller<sup>6</sup>, Norman K. Fry<sup>3,6</sup>, Elisabeth A.M. Sanders<sup>1,2</sup>, and Krzysztof Trzciński<sup>1#</sup>  
9

10  
11 <sup>1</sup> Department of Pediatric Immunology and Infectious Diseases, Wilhelmina Children's  
12 Hospital, University Medical Center Utrecht (UMCU), The Netherlands  
13

14 <sup>2</sup> Centre for Infectious Disease Control Netherlands, National Institute for Public Health and  
15 the Environment (RIVM), Bilthoven, The Netherlands  
16

17 <sup>3</sup> Respiratory and Vaccine Preventable Bacterial Reference Unit (RVPBRU), Public Health  
18 England – National Infection Service, Colindale, London, United Kingdom  
19

20 <sup>4</sup> Regional Laboratory of Public Health (Streeklab) Haarlem, The Netherlands  
21

22 <sup>5</sup> Spaarne Gasthuis, Hoofddorp, The Netherlands  
23

24 <sup>6</sup> Immunisation and Countermeasures Division, Public Health England (PHE) – National  
25 Infection Service, Colindale, London, United Kingdom  
26

27 #Corresponding author  
28

29 UMCU  
30 Heidelberglaan 100, HP – G04.614  
31 3508 AB Utrecht  
32 The Netherlands  
33 [K.Trzcinski@umcutrecht.nl](mailto:K.Trzcinski@umcutrecht.nl)  
34 Phone: +31 645 707 151  
35  
36

37 Running title: Two to Tango.  
38

39 **ABSTRACT**

40 **Background:** The specificity of molecular methods for the detection of *Streptococcus*  
41 *pneumoniae* carriage is under debate. We propose a procedure that increases the accuracy of  
42 molecular detection of live pneumococci in polymicrobial respiratory samples.

43

44 **Methods:** Culture and qPCR methods were applied to detect *S. pneumoniae* and  
45 pneumococcal serotypes in 1549 nasopharyngeal samples collected in the Netherlands  
46 (n=972) and England (n=577) from 946 toddlers and 603 adults, and in paired oropharyngeal  
47 samples collected exclusively from 319 Dutch adults. Samples with no live pneumococci  
48 isolated at primary diagnostic culture yet generating pneumococcus-specific signal in qPCRs  
49 were re-examined with a second, qPCR-guided culture. Optimal C<sub>q</sub> cut-offs for positivity in  
50 qPCRs were determined via receiver operating characteristic (ROC) curve analysis using  
51 isolation of live pneumococci from the primary and qPCR-guided cultures as reference.

52

53 **Results:** Detection of *S. pneumoniae* and pneumococcal serotypes with qPCRs in cultured  
54 (culture-enriched) nasopharyngeal samples exhibited near-perfect agreement with  
55 conventional culture (Cohen's kappa: 0.95). Molecular methods also displayed increased  
56 sensitivity of detection for multiple serotype carriage. Among paired samples from adults, the  
57 sensitivity of *S. pneumoniae* detection in primary nasopharyngeal plus oropharyngeal cultures  
58 was significantly lower compared with molecular detection in both culture-enriched samples  
59 together ( $p < 0.0001$ ) and also in culture-enriched oropharyngeal samples alone ( $p < 0.05$ ).

60

61 **Conclusions:** The sensitivity of *S. pneumoniae* carriage surveillance can be greatly improved  
62 by complementing conventional culture with qPCR and *vice versa*. The specificity of  
63 molecular methods for the detection of live pneumococci can be enhanced by incorporating  
64 statistical procedures based on ROC curve analysis. The procedure we propose improves  
65 detection of *S. pneumoniae* carriage in adults in particular and enhances specificity of  
66 serotype carriage detection.

67

68 **Keywords:** *Streptococcus pneumoniae*, carriage, diagnostic accuracy.

## 69 INTRODUCTION

70 *Streptococcus pneumoniae* (pneumococcus) is the most common aetiological agent of  
71 invasive bacterial disease [1] and of community-acquired pneumonia of bacterial aetiology  
72 [2]. Despite being vaccine-preventable, pneumococcal disease remains among the leading  
73 causes of death in childhood [3] as available vaccines target only a various subsets of only  
74 twenty-four from ca. 100 of the known serotypes. Due to high pneumococcal carriage rates  
75 [4, 5] children are considered the primary reservoir of pneumococcus and the main drivers of  
76 transmission and infections in any population [6-8]. Children are also the primary group  
77 targeted with pneumococcal vaccination [9].

78

79 With pneumococcal vaccines protecting not only against disease but also against  
80 colonization, carriage is now an accepted endpoint in vaccination studies [10]. Following the  
81 introduction of pneumococcal conjugate vaccines (PCV), of which ten-valent (PHiD-CV,  
82 GSK) and thirteen-valent (PCV13, Pfizer) are currently marketed, epidemiological  
83 surveillance of carriage became an essential tool for monitoring the direct and indirect (herd  
84 protection) effects of vaccination. Surveillance of carriage is also used to detect the  
85 emergence and track expansion of non-vaccine serotypes, the phenomenon described as  
86 vaccine-induced serotype replacement [11]. Finally, carriage studies are instrumental in  
87 monitoring serotype-associated invasiveness [12].

88

89 To understand the trends in pneumococcal epidemiology and guide strategies for PCV use, it  
90 is critical to establish methodology for *S. pneumoniae* carriage detection that is sufficiently  
91 sensitive across all ages [13, 14]. However, conventional culture, which is considered to be  
92 the gold standard method in carriage detection, is not suitable for detection of multiple  
93 serotype carriage [15] and lacks the sensitivity when used to detect *S. pneumoniae* in age  
94 groups other than children [16]. There is also evidence that testing solely a single site within  
95 the upper airways reduces sensitivity of carriage detection [17-19].

96

97 Molecular methods have largely improved the sensitivity of *S. pneumoniae* detection and  
98 have made multiple serotype carriage detection feasible [4, 20]. Using assays developed by  
99 our groups and others, we have tested the serotype composition of respiratory samples from  
100 children and adults and have demonstrated an under-detection of *S. pneumoniae* and of  
101 individual pneumococcal serotypes by culture when compared with molecular methods [7,  
102 18, 21-24]. However, some caution that molecular methods exhibit poor specificity due to the  
103 presence of pneumococcal genes among commensal streptococci [25-27]. It could also be  
104 argued that molecular detection is unable to discriminate between live bacteria and presence  
105 of relic DNA [28].

106

107 Here, we outline the protocol that combines conventional culturing with pneumococcus-  
108 specific qPCRs and employs statistical procedures to interpret the molecular results and  
109 enhances the specificity of the molecular methods. We show that molecular methods applied  
110 to nasopharyngeal samples demonstrate near-perfect agreement with primary culture and yet  
111 the sensitivity of *S. pneumoniae* carriage surveillance can be greatly enhanced by

112 complementing conventional culture with qPCRs and *vice versa*. We also show that testing  
113 nasopharyngeal samples alone leads to underestimation of pneumococcal carriage in adults.  
114

## 115 **MATERIALS AND METHODS**

### 116 **Study Design and Ethics Statement**

117 Pneumococcal carriage was investigated in two cross-sectional prospective observational  
118 studies conducted in 2015/2016 in community-dwelling individuals in the Netherlands [29]  
119 and in England [30]. The study conducted in the Netherlands was approved by the Medical  
120 Ethics Committee Noord Holland (NTR5405 on <http://www.trialregister.nl>). The study  
121 conducted in England was approved by the NHS Health Research Authority and the London  
122 Fulham Research Ethics Committee (reference 15/LO/0458) and was registered on  
123 [clinicaltrials.gov](https://clinicaltrials.gov) (reference NCT02522546). Both studies were conducted in accordance with  
124 Good Clinical Practice and the Declaration of Helsinki.

125

### 126 **Sample Collection and Laboratory Processing**

127 Respiratory samples were collected in the Netherlands between October 2015 and March  
128 2016 in the study on carriage of respiratory bacterial pathogens coordinated by National  
129 Institute of Public Health and the Environment. Nasopharyngeal samples were collected in  
130 children aged 24 months ( $\pm 1$  month) vaccinated with PHiD-CV according to “2 primary + 1  
131 booster” (2p+1b) dose schedule, children aged 44 to 49 months vaccinated with PHiD-CV in  
132 3p+1b schedule, and parents of the 24-month-old children (one parent per child).  
133 Oropharyngeal swabs were also collected from Dutch adults [29, 31]. The English study took  
134 place between July 2015 and June 2016 and was conducted by the National Vaccine  
135 Evaluation Consortium which included Public Health England [30]. In England,  
136 nasopharyngeal samples were collected in children aged 1-5 years vaccinated with PCV13  
137 according to a 2p+1b schedule and in their household contacts (adults aged >20 years).

138

139 All samples were obtained according to World Health Organization standard procedures [4].  
140 Immediately after sampling, swabs in the Netherlands were placed in liquid Amies transport  
141 medium (Copan, Brescia, Italy) and within 8 hours transported to the diagnostic laboratory.  
142 In England swabs were placed in skim-milk, tryptone, glucose and glycerol (STGG) broth  
143 and delivered to a diagnostic laboratory within 48 hours (**Table S1**).

144

145

### 146 **Conventional Culture**

147 Approximately 50  $\mu$ l of specimen was used as an inoculum in detection of pneumococci by  
148 conventional culture (primary culture). In the Netherlands samples were cultured on SB7-  
149 Gent agar selective for streptococci (BA-GENT, Oxoid, Badhoeve Dorp, The Netherlands)  
150 and on non-selective Columbia blood agar (CBA, Oxoid). In England samples were cultured  
151 on Streptococcus-selective Blood Agar (COBA, Oxoid, Basinstoke, United Kingdom) and  
152 CBA (Oxoid). Remaining of transport media were stored frozen at  $-70^{\circ}\text{C}$ . In the Netherlands,  
153 samples were aliquoted into 200  $\mu$ l volumes, and a single aliquot was supplemented with  
154 glycerol (10% v/v final concentration) prior to freezing.

155

156 After overnight incubation at  $37^{\circ}\text{C}$  and 5%  $\text{CO}_2$ , cultures were screened for pneumococcus-  
157 like colonies to be re-cultured. Once screened, in the Netherlands all colony growth was  
158 harvested from BA-GENT plate into 10% glycerol in brain heart infusion broth (Oxoid) [24].

159 In England, all colony growth was harvested from any plates containing alpha-haemolytic  
160 colonies into PBS, centrifuged, the supernatant removed, and any growth stored as a pellet  
161 [30]. These samples were considered culture-enriched (CE) for pneumococci and stored at -  
162 80°C. Cultured strains (one per sample, but more if distinct pneumococcal morphotypes were  
163 apparent) were serotyped by Quellung method in the Netherlands [29] and with the  
164 previously described PneumoCaT bioinformatic pipeline in England that was supplemented  
165 with slide agglutination when required [30, 32].

166

#### 167 **Molecular Detection of *Streptococcus pneumoniae***

168 Molecular detection of *S. pneumoniae* in respiratory samples was conducted as described  
169 previously [24]. For this, Amies medium, STGG medium, and culture-enriched samples were  
170 shipped on dry ice from primary diagnostic sites to the study central laboratory in the  
171 Netherlands. There, pellets of culture-enriched samples collected in England were  
172 reconstituted to the original volume. Next, nucleic acids were extracted from 100 µl of  
173 medium using the DNeasy Blood and Tissue Kit (Qiagen) and eluted into 200 µl. These  
174 extractions represented minimally processed samples. For culture-enriched samples, 100 µl  
175 of a bacterial growth harvest was centrifuged for 2 min at 14,000 ×g, the pellet was  
176 resuspended with 90 µl of TE buffer (20 mM Tris-HCl [pH 8.0], 2 mM EDTA) and incubated  
177 for 15 min at 95°C. Next, 90 µl of lysis buffer (20 mM Tris-HCl [pH 8.0], 2 mM EDTA, 2.4  
178 % Triton X-100 and 40 mg/ml lysozyme) was added, and the samples were processed as  
179 above. Pneumococcal DNA was detected via single plex qPCR using primers and probe  
180 targeting sequences within genes coding for the pneumococcal iron uptake ABC transporter  
181 lipoprotein PiaB [18], and for the major pneumococcal autolysin LytA [33] by testing 5.5 µl  
182 DNA from minimally processed or 1.0 µl of culture-enriched samples.

183

#### 184 **Molecular Detection of Pneumococcal Serotypes**

185 DNA extracted from culture-enriched harvests was used to determine the serotype  
186 composition of nasopharyngeal and oropharyngeal samples using a panel of primers and  
187 probes [34-36], targeting all serotypes covered by pneumococcal vaccines available either in  
188 the Netherlands or in England at the time of sample collection (PHiD-CV, PCV13 and 23-  
189 valent polysaccharide vaccine, PPV23, Merc Sharp Dohme) except for serotype 2. The panel  
190 also covered selected non-vaccine serotypes (serotypes 6C, 6D, 7A, 10B, 12A, 12B, 15A,  
191 15C, 15F, 16F, 21, 22A, 23A, 23B, 33A, 34, 35B, 35F, 37 and 38). However, with certain  
192 assays targeting more than one serotype it was not possible to distinguish between serotypes  
193 6A and 6B; 6C and 6D; 7A and 7F; 9A, 9L, 9N and 9V; 10A and 10B; 11A and 11D; 12A,  
194 12B and 12F; 15A, 15B, 15C and 15F; 33A, 33F and 37; 35B and 35C when detected with  
195 qPCR. A sample pooling strategy was employed when testing for serotypes in order to reduce  
196 the number of serotype-specific qPCRs. For this, samples generating any signal below C<sub>q</sub> 40  
197 for either *piaB* or *lytA* were pooled in groups of five to be tested [7] and all remaining  
198 samples were pooled in groups of ten. Samples negative for *piaB* and *lytA* were tested to  
199 assess specificity of serotype/serogroup-specific assays [7]. Samples from pools generating a  
200 signal for a particular serotype/serogroup were tested individually. In the Netherlands, the

201 PCRs were performed on the LightCycler 2 platform and in England they were performed on  
202 the QuantStudio 7 platform, using identical PCR conditions.

203

### 204 **qPCR-guided Recovery of Live *S. pneumoniae* Strains**

205 Culture-enriched samples classified as negative in primary diagnostic culture but positive by  
206 qPCR were revisited with culture in a second attempt to isolate live pneumococci. For this,  
207 CBA plates were inoculated with 100  $\mu$ l of  $10^{-1}$ - $10^{-3}$  and  $10^{-3}$ - $10^{-5}$  dilution of culture-enriched  
208 nasopharyngeal and culture-enriched oropharyngeal samples, respectively, and incubated at  
209 37°C and 5% CO<sub>2</sub>. Pneumococcus-like colonies were individually tested in qPCR for *piaB*  
210 and *lytA* and confirmed to be *S. pneumoniae* based on susceptibility to optochin.

211

### 212 **Statistical Analysis**

213 Data analysis was performed in GraphPad Prism software version 9.1.0 and R version 4.1.0.  
214 Receiver operating characteristic (ROC) curve analysis was performed using the “cutpointr”  
215 R package to validate qPCR results with culture results (primary culture plus qPCR-guided  
216 culture). Maximum Youden index values, the sum of sensitivity and specificity minus one,  
217 were estimated via bootstrapping (n=1000) on *piaB* and *lytA* qPCR data from respiratory  
218 samples to determine optimal cut-off values for qPCR detection [37]. Two-way mixed effects  
219 intraclass correlations (ICCs) [38] and Bland-Altman plots [39] were used to evaluate  
220 agreement for quantitative results using the “irr” and “blandr” R packages, respectively.  
221 Carriage rates were compared with McNemar’s test unless otherwise stated. Estimates for  
222 accuracy of diagnostic tests between methods (subgroups) were compared with a test of  
223 interaction [40]. A *p* value of <0.05 was considered significant. Diagnostic test parameters  
224 (predictive values, sensitivity, and specificity) were calculated using an in-house made R  
225 function (<https://github.com/wmiellet/test-comparison-R>), and 95% confidence intervals were  
226 calculated with Wilson-Brown score. Cohen’s kappa, a measure of chance-corrected  
227 agreement, and its 95% confidence interval was calculated as described by McHugh [41] and  
228 ratios of  $\leq 0$ , 0.01-0.20, 0.21-0.40, 0.41-0.60, 0.61-0.80 and  $>0.81$  were interpreted as  
229 exhibiting poor, slight, fair, moderate, substantial, and near-perfect agreement, respectively  
230 [42]. For comparison between serotyping by culture and by qPCR, analysis was limited to  
231 qPCR-targeted serotypes. For serogroup-specific qPCR assays a result was considered  
232 congruent when a serogroup was detected in qPCR that matched the serogroup of the  
233 serotype detected by culture.

234

### 235 **Assessment of method’s inter-laboratory reproducibility**

236 One-hundred seventy-six nasopharyngeal samples collected in England and n=59  
237 oropharyngeal samples collected in the Netherlands have been selected to evaluate the inter-  
238 laboratory reproducibility of molecular methods. For this, an aliquot of minimally processed  
239 STGG nasopharyngeal sample, a fresh preparation of culture enriched nasopharyngeal  
240 sample from a subset of the English study samples and culture-enriched oropharyngeal  
241 samples from a subset of the Dutch study samples were tested at the study site in England, as  
242 described above. Results for paired samples were compared between centres by calculating  
243 the percent agreement and Cohen’s kappa. Quantitative results of both laboratories were also  
244 compared by calculating an intraclass correlation coefficient (ICC) and by comparing results

245 in Bland-Altman plots. Carriage rates between both laboratories were compared using  
246 Cohen's kappa.



## 247 RESULTS

248 We evaluated the performance of conventional and molecular methods applied to detect *S.*  
249 *pneumoniae* and pneumococcal serotypes in 1549 nasopharyngeal samples collected from  
250 946 children aged 1-5 years (n=653 in the Netherlands and n=293 in England) and from 603  
251 adults (n=319 in the Netherlands and n=284 in England), and on oropharyngeal samples from  
252 319 adults in the Netherlands. All PCR results shown were generated by testing the Dutch  
253 and English samples in the Dutch laboratory, except were stated otherwise.

254

### 255 Detection of *Streptococcus pneumoniae*

256 When analysing culturing results without the addition of PCR-guided culturing, live *S.*  
257 *pneumoniae* was isolated from 29% (445/1549) of primary cultures of nasopharyngeal swabs  
258 (**Fig. 1A**), with significantly higher fraction of samples from children (45% or 422/946)  
259 compared with adults (4% or 23/603) positive for pneumococcus (Pearson's chi-square,  
260  $p<0.0001$ ). Among 319 adults sampled in the Netherlands (**Fig. 1B**), live pneumococcus was  
261 significantly more often cultured from nasopharyngeal (n=15 or 5%) compared with  
262 oropharyngeal (n=3 or 1%) samples ( $p<0.01$ ).

263

264 Next, we conducted qPCRs on minimally processed and culture-enriched samples. To  
265 enhance the specificity of detection we used a “two-to-tango” approach by quantifying *piaB*  
266 and *lytA* genes and considering a sample to be positive for *S. pneumoniae* when both targets  
267 were detected. When applying an arbitrary quantification cycle ( $^A C_q$ ) of  $<40 C_q$  as criterium  
268 for positivity altogether 583 nasopharyngeal swabs (38% of 1549) were identified as positive  
269 for pneumococcus (**Fig. 2A** and **2B**). The fraction of positive samples was significantly  
270 higher among minimally processed compared with culture-enriched swabs (561 or 36%  
271 versus 479 or 31% of 1549;  $p<0.0001$ ). In line with results of primary diagnostic culture, here  
272 too the proportion of positive samples was higher in children compared with adults  
273 (Pearson's chi-square,  $p<0.0001$ ) whenever nasopharyngeal swabs were tested minimally  
274 processed (56% or 528/946 versus 5% or 33/603) or culture-enriched (48% or 454/946 versus  
275 4% or 25/603). However, contrary to results of primary diagnostic culture, among adults  
276 significantly larger proportions of oropharyngeal compared with nasopharyngeal samples  
277 ( $p<0.0001$ ) have been classified as positive for pneumococcus with qPCR whenever tested  
278 minimally processed (26% or 83/319 versus 6% or 19/319) or culture-enriched (18% or  
279 58/319 versus 6% or 18/319).

280

281 Next, samples negative for pneumococcus in primary diagnostic cultures yet generating  
282 signal in qPCRs for *piaB* and *lytA* were cultured again. This qPCR-guided culture effort  
283 increased the number of samples from which live pneumococci was cultured, in relatively  
284 small albeit significant increase of 3% (from 445 vs. 460 of 1549;  $p<0.0001$ ) for  
285 nasopharyngeal (**Fig. 1A, 2A, and 2B**) and 666% increase (from 3 to 23 of 319;  $p<0.0001$ )  
286 for oropharyngeal samples (**Fig. 1B, 2E, and 2F**).

287

288 To validate qPCR results using culture and to further enhance the specificity of qPCR  
289 methods for the detection of live pneumococci we performed receiver operating characteristic  
290 (ROC) curve analysis and identified  $C_q$  cut-off values that yielded maximum Youden indices

291 (Table 1). Reliability of positive qPCR results was assessed with Bland-Altman plots (Fig.  
292 2C and 2D and Fig. 2G and 2H and supplementary information Table S2) and by calculating  
293 the intraclass correlation coefficient between *piaB* and *lytA*. Samples with  $C_q$  values below  
294 the ROC-derived  $C_q$  criterium ( $^{ROCd}C_q$ ) demonstrated excellent agreement between *piaB* and  
295 *lytA* while samples with a  $C_q$  value above the  $^{ROCd}C_q$  threshold displayed poor agreement  
296 (Table S2). Using the  $^{ROCd}C_q$  criterium we classified 33% (512/1549) of minimally processed  
297 nasopharyngeal samples as positive for pneumococcus (Fig. 1A). It included 52% (489/946)  
298 samples from children and 4% (23/603) from adults. For culture-enriched samples  
299 application of  $^{ROCd}C_q$  resulted in 30% (469/1549) classified as positive including 47%  
300 (447/946) samples from children and 4% (22/603) from adults (Fig. 1A). With  $^{ROCd}C_q$ , the  
301 adults in the Netherlands were again significantly more often positive for pneumococcus in  
302 oropharyngeal compared to nasopharyngeal samples whenever tested minimally processed  
303 (19% or 59/319 versus 5% or 15/319;  $p<0.0001$ ) or culture-enriched (12% or 39/319 versus  
304 5% or 15/319;  $p<0.01$ ) (Fig. 1B).

305

### 306 Comparison of Molecular Methods to Culturing Live *S. pneumoniae*

307 We compared the diagnostic accuracy of detection methods using the combined results of  
308 primary diagnostic and qPCR-guided culturing as reference and applying  $^{ROCd}C_q$  criteria for  
309 positivity in qPCRs (Fig. 1A). For nasopharyngeal samples alone (Table 2), molecular  
310 detection of pneumococcus displayed near-perfect, and substantial agreement to the reference  
311 for culture-enriched and minimally processed samples, respectively. This represented  
312 significantly reduced agreement for minimally processed compared with culture-enriched  
313 samples ( $p<0.0001$ ). Molecular detection in minimally processed samples identified  
314 significantly more samples positive for pneumococcus compared with culture-enriched  
315 samples from children ( $p<0.0001$ ) but not adults ( $p=1$ ), the difference we attributed to low  
316 number of positive nasopharyngeal samples among collected from adults. Exclusively for  
317 children, molecular detection of pneumococcus in culture-enriched samples demonstrated  
318 significantly increased sensitivity ( $p<0.001$ ) and specificity ( $p<0.0001$ ) compared with  
319 molecular detection in minimally processed samples.

320

321 For paired nasopharyngeal and oropharyngeal samples from adults, the isolation of *S.*  
322 *pneumoniae* in primary or qPCR-guided culture in either nasopharyngeal or oropharyngeal  
323 swab was used as the reference in method accuracy analysis (Table 3). Although the  
324 sensitivity of *S. pneumoniae* detection with primary nasopharyngeal culture was significantly  
325 higher compared with corresponding values for primary oropharyngeal cultures ( $p<0.001$ ),  
326 every detection method when applied to a single sample type displayed only slight to  
327 moderate agreement to the reference. Moreover, the sensitivity of *S. pneumoniae* detection  
328 with either nasopharyngeal and oropharyngeal primary cultures was significantly lower  
329 compared with molecular detection in culture-enriched oropharyngeal samples ( $p<0.05$ ) and  
330 also when compared with molecular detection with either culture-enriched sample of either  
331 type ( $p<0.0001$ ). To this extent, molecular detection in culture-enriched oropharyngeal plus  
332 nasopharyngeal samples displayed the highest agreement to the reference out of all other  
333 evaluated approaches (Table 3).

334

335

336

### 337 **Comparison of Serotype Carriage Detection Methods**

338 With conventional culture (without PCR-guided additional culture), 29% (445/1549) of  
339 nasopharyngeal samples including 45% (422/946) from children and 4% (23/603) from adults  
340 were positive for a serotype (nontypeable pneumococci excluded), as already described  
341 above. Next, we assessed the accuracy of molecular methods when applied to detect carriage  
342 of pneumococcal serotypes. **Figure S1** depicts results of serotype detection in culture-  
343 enriched samples tested with serotype-specific qPCR assays. None of the samples generated  
344 any signal in qPCRs targeting serotype 1, and 23F and serogroup 18, nor was positive for any  
345 of these serotypes by culture. The assays targeting serotypes 4, 5 showed a lack of specificity  
346 and the assay targeting serotype 17F showed lack of sensitivity when applied to both,  
347 nasopharyngeal and to oropharyngeal samples. Results of these three assays were excluded  
348 from analysis.

349

350 Four-hundred and twenty-three nasopharyngeal samples were positive for one or more  
351 serotypes targeted in qPCRs either by culture (n=393 samples) or with molecular methods  
352 (n=411 samples) and applying  $^{ROCd}C_q$  criterium for positivity for a serotype. It included 42%  
353 (395/946) samples from children and 3% (16/603) from adults. Altogether, there were n=479  
354 serotypes carriage events detected by testing nasopharyngeal samples with either  
355 conventional culture or molecular methods (**Table S3**). For serotypes targeted by qPCRs  
356 detected in nasopharyngeal samples the results of molecular detection displayed excellent  
357 agreement (ICC 0.93, 95% CI 0.92-0.94) with *piaB* and *lytA*  $C_{qs}$  (**Fig. 3**) and, with exception  
358 of serotype 3, almost perfect agreement (Cohen's kappa >0.81) with isolation of live strain of  
359 a particular serotype from nasopharyngeal swab (**Fig. 4**). Also, results of serotype detection  
360 in oropharyngeal samples from adults displayed excellent agreement with *piaB* and *lytA*  $C_{qs}$   
361 (ICC 0.96, 95% CI 0.92-0.98) (**Fig. S2**). Finally, there was near-perfect agreement between  
362 overall serotypes carriage events detected by qPCR compared with detected by culture  
363 (**Table 4**).

364

365 Multiple-serotype carriage events were significantly more often detected using molecular  
366 methods compared with culture ( $p<0.0001$ ). Furthermore, despite a limited number of  
367 different serotypes tested by qPCR, observed multiple-serotype carriage frequencies were not  
368 significantly different from expected frequencies based on molecular detection on culture-  
369 enriched NP samples (11% versus 9%, respectively; one proportion Z-test,  $p=0.2669$ ) unlike  
370 detection of multiple-serotype carriage by culture which significantly underestimated  
371 expected frequencies (2% versus 9%, respectively; one-proportion Z-test,  $p<0.0001$ ).

372

### 373 **Interlaboratory Comparison of Methods**

374 To evaluate the reproducibility of molecular methods and to assess the agreement in  
375 laboratory results between the Netherlands and England we processed a subset of culture-  
376 enriched samples from both countries in both laboratories. Results for *piaB* and *lytA* qPCRs  
377 demonstrated good reliability between both laboratories (**Table S4**). We observed near-  
378 perfect agreement identifying culture-enriched samples as positive for pneumococcus with

379 molecular methods, and substantial agreement for minimally processed nasopharyngeal  
380 samples (**Table S5**). For culture-enriched nasopharyngeal samples we evaluated agreement  
381 between both laboratories for serotype carriage detection by qPCR. Overall, near-perfect  
382 agreement was observed (Cohen's kappa 0.82, 95% CI 0.74 – 0.90).

## 383 **DISCUSSION**

384 In the current study we have demonstrated that molecular methods exhibit near-perfect  
385 agreement to conventional culture in the detection and serotyping of *S. pneumoniae* in  
386 children and adults when a nasopharyngeal swab is the only sample tested. Furthermore, we  
387 have observed increased sensitivity of *S. pneumoniae* carriage detection among adults by  
388 testing oropharyngeal samples with molecular methods and conducting qPCR-guided  
389 culturing. We highlight several statistical procedures that can be used to evaluate the  
390 reliability of molecular results and enhance the specificity of molecular methods for the  
391 detection of live *S. pneumoniae*.

392

393 The current gold standard method for carriage detection is the isolation of live pneumococci  
394 from cultures of deep trans-nasal nasopharyngeal swab, in adults complemented with culture  
395 of a swab collected trans-orally (OP) [4]. However, the gold standard lacks sensitivity in case  
396 of low-density carriage or when applied to poly-microbial samples in which *S. pneumoniae* is  
397 not a dominant bacterium and it does not allow the detection of co-carriage of pneumococcal  
398 strains [7, 18, 19, 21, 43]. Since the density of pneumococcal carriage episodes in adults is  
399 much lower than in children [18], sampling multiple sites increases sensitivity of carriage  
400 detection [7, 16, 18]. However, carriage surveillance based exclusively on primary diagnostic  
401 cultures of nasopharyngeal and oropharyngeal samples often provides low quality data in  
402 adults. This limitation of the gold standard method is of particular concern for surveillance of  
403 carriage in older adults [19, 24], the age group with the largest incidence and burden of  
404 pneumococcal pneumonia and invasive pneumococcal disease [2, 44] as carriage is often  
405 reported to be virtually absent when the gold standard method is applied [16, 45].

406

407 To overcome these limitations, we complement conventional culture with molecular methods  
408 to improve the overall sensitivity of *S. pneumoniae* carriage detection [7, 18, 21-24]. This  
409 approach is particularly effective when applied to highly poly-microbial samples from the  
410 oral niche. To validate this method, we have compared the performance of molecular  
411 methods to the gold standard. While demonstrating near-perfect agreement with primary  
412 nasopharyngeal cultures from children, application of qPCR-based methods still significantly  
413 increased the number of carriers detected. Near perfect agreement was also observed in adults  
414 when analysis focused explicitly on nasopharyngeal swabs. In adults, application of qPCR-  
415 based methods to nasopharyngeal samples did not increase sensitivity of carriage detection.

416

417 Importantly, in adults testing oropharyngeal samples changed the results dramatically. By  
418 revisiting samples negative in primary culture yet positive by qPCR with culture qPCR-  
419 guided culturing we have significantly increased the number of adult carriers from whom  
420 viable pneumococci were isolated. It demonstrates that molecular methods can improve the  
421 overall sensitivity of *S. pneumoniae* detection, a result in line with previous reports by us and  
422 others [7, 16, 18, 22, 46]. It also highlights that the gold standard method applied to  
423 oropharyngeal cultures severely underestimates presence of *S. pneumoniae* in adults as  
424 qPCR-guided culturing increased by 7.7-fold the number of oropharyngeal samples from  
425 which viable pneumococci were isolated. Interestingly, there is evidence that testing

426 oropharyngeal in addition to nasopharyngeal samples substantially enhances sensitivity of  
427 carriage detection also in children [17].

428

429 Concerns have been raised that the molecular methods are overly sensitive and lack  
430 specificity for the detection of live bacteria as “relic DNA” (DNA from non-intact cells)  
431 could be detected as well [28]. Indeed, live pathogens are less likely to be cultured from  
432 samples displaying weak positivity by qPCR [21, 47]. While this may reflect limitations in  
433 current culturing techniques, it could also indicate presence of relic DNA that may reflect  
434 recent exposure to pneumococcus instead of colonization proper [28]. The addition of the  
435 culture-enrichment procedure prior to molecular detection reduces the risk of misclassifying  
436 these events as carriage, thus improving the specificity of detection for live pneumococci.  
437 Culture-enrichment also increases the sensitivity of carriage surveillance, in particular for  
438 poly-microbial samples [7, 18, 21-24, 46-48]. Indeed, we observed that *S. pneumoniae*  
439 detection in culture-enriched samples displayed significantly increased, sensitivity,  
440 specificity, and agreement with culture and qPCR-guided culture when compared with  
441 detection in minimally processed samples.

442

443 To further improve the specificity of molecular methods for live pneumococci we performed  
444 ROC curve analysis to estimate with the Youden index  $C_q$  cut-off values that display an  
445 optimal combination of sensitivity and specificity for samples positive for *S. pneumoniae* by  
446 culture in primary cultures or qPCR-guided cultures [37]. This approach excluded samples  
447 that exhibited minimal positivity for targeted genes by qPCR or displayed poor agreement  
448 between *piaB* and *lytA* genes as shown in Bland-Altman graphs and with the intra-class  
449 correlation coefficient. The use of the Youden index in a ROC curve analysis to identify  
450 optimal  $C_q$  cut-off values enhances the specificity of molecular methods for detection of live  
451 pneumococcus, and the  $^{ROCd}C_q$  criteria can be used to direct qPCR-guided culturing. The  
452 success of this approach is dependent on culturing methods, therefore care should be taken to  
453 employ sensitive culturing techniques, such as the use selective culture plates [4].  
454 Furthermore, for molecular methods to be informative for culturing efforts DNA extraction  
455 should be performed irrespective of the identification of pneumococcal growth in cultures.  
456 ROC curve analysis with the Youden index may yield overly stringent  $C_q$  cut-off values if  
457 qPCR-guided culturing efforts are not conducted, which could result in classifying samples  
458 containing live pneumococci as negative by qPCR. Recent advances in culturing techniques  
459 may further enhance the specificity of molecular methods for the detection of live *S.*  
460 *pneumoniae* [49].

461

462 Some studies have cautioned against the use of molecular methods due to the presence of  
463 pneumococcal genes among commensal streptococci [25-27]. This phenomenon is likely to  
464 be common among bacterial species co-existing in a shared niche [50-52] and of particular  
465 concern for highly poly-microbial samples, hence careful selection of targeted genes is  
466 important [53]. As previously described by our group [18, 22, 23] and others [54] a “two-to-  
467 tango” approach, quantifying both *piaB* and *lytA* genes with molecular methods enhances the  
468 specificity of *S. pneumoniae* detection in poly-microbial samples. This approach allows for  
469 measurements to be evaluated in a reliability analysis on a per sample basis [39] and for bias

470 between measurements to be identified. While systemic biases between quantified genes  
471 could reflect dissimilarities between qPCR assay efficiencies, non-systemic biases can arise  
472 due to the presence of a gene or closely related sequence in DNA from other bacterial  
473 species. In case of multiple serotype carriage, serotype-specific abundance of the dominant  
474 serotype should display high agreement to targeted genes used to detect pneumococcus (e.g.,  
475 *piaB* and *lytA*) while serotype-specific abundances of nondominant serotypes may display  
476 reduced agreement. Serotypes that exhibit greater abundances than *piaB* or *lytA*, or appear to  
477 be present in samples classified as negative for *S. pneumoniae* are likely to be due to  
478 commensal streptococci harbouring genes involved in the biosynthesis of the pneumococcal  
479 polysaccharide capsule [55, 56]. As such, certain serotype-specific assays may be nonreliable  
480 in poly-microbial sample types.

481

482 Insights into the co-occurrence of multiple serotypes in carriage is critical for understanding  
483 the dynamics of the serotypes during colonization, host-to-host transmission, and carriage  
484 progression into disease. Detection of secondary strains present in co-carriage is also  
485 important when distinguishing between unmasking and serotype replacement in assessment  
486 of pneumococcal vaccines impact [57]. However, as demonstrated in our study, and  
487 described previously the gold standard method does not readily allow detection of multiple  
488 serotypes, an event that is likely to occur often in carriage [57]. Furthermore, using our  
489 methodology we have observed no significant difference in observed and expected  
490 frequencies of multiple-serotype carriage despite what has been reported previously by others  
491 whom exclusively used data from conventional culture as method of detection [58].

492

493 An important strength of our study is the application of the procedure to two different  
494 carriage studies conducted in two different countries, and the evaluation of reproducibility in  
495 an interlaboratory comparison. Another strength of our study is that the procedure described  
496 is flexible and can be readily adapted to the carriage surveillance of other bacteria, such as  
497 *Neisseria meningitidis* [47].

498

499 Our study had a number of limitations, the impact of testing oropharyngeal samples was only  
500 evaluated for Dutch adults and not adults sampled in England nor for any children. Since  
501 oropharyngeal samples tested were collected explicitly from Dutch adults, our findings could  
502 be unique for that demographic group and geographic location. In the protocol described we  
503 only used *piaB* and *lytA* to detect *S. pneumoniae* with molecular methods and we did not  
504 evaluate the procedure with alternative targets described by others [54, 59]. Furthermore, we  
505 tested for a limited number of serotypes by qPCR. Finally, not all serotypes were shown to be  
506 equally reliably detected with molecular methods and for a number of qPCR assays we were  
507 not able to identify the serotype within a serogroup.

508

509 In summary, we argue that accurate detection of pneumococcal carriage using qPCR requires  
510 concordant quantification of two genes ('two-targets-to-tango') to classify a sample as  
511 positive for pneumococcus. Similarly, qPCR-based detection requires concordance between  
512 pneumococcal and serotype-specific quantification to assure specificity of the method (two-  
513 targets-to-tango). We provide evidence that accurate detection of pneumococcal carriage in

514 adults requires at least testing of both, nasopharyngeal and oropharyngeal samples ('two-  
515 samples-to-tango') and requires molecular detection to be intertwined with culture ('two  
516 methods-to-tango'). Finally, we advise revisiting samples for qPCR-guided culturing ('two-  
517 cultures-to-tango') when positive by qPCR but negative at primary diagnostic culture. The  
518 use of qPCR-guided culturing is of utmost importance for oropharyngeal swabs.

519

520 We have outlined the procedure that enhances the specificity of molecular methods for the  
521 surveillance of pneumococci and of pneumococcal serotypes in nasopharyngeal and  
522 oropharyngeal samples. Our results demonstrate near-perfect agreement between  
523 conventional culture and molecular methods when applied to nasopharyngeal samples from  
524 children. We have shown that the sensitivity of *S. pneumoniae* carriage surveillance can be  
525 greatly enhanced by complementing conventional culture with qPCRs. In adults, testing  
526 oropharyngeal on the top of nasopharyngeal samples was of paramount importance for  
527 accuracy of pneumococcal carriage detection. Studies investigating impact of testing  
528 oropharyngeal samples on detection of pneumococcal carriage in children are needed.



529 **Authors' contribution.** E.A.M.S. and K.T. had an idea and initiated the study. N.R., E.M.,  
530 N.K.F., E.A.M.S. and K.T. secured financial support. N.F. and K.T. led the project. A.J.W-  
531 M., P.B., C.S., M.v.H., N.R., E.M., and N.K.F. conducted carriage studies, collected the data  
532 and provided study materials. W.R.M., J.v.V., and K.T. developed and validated laboratory  
533 methods, and wrote the laboratory protocol. W.R.M., J.v.V., D.L., P.B., T.N., S.M., R.T.,  
534 S.E., and C.S. analysed samples and collected the data. W.R.M., R.M., and K.T. contributed  
535 analytical tools. W.R.M., J.v.V., and D.L. curated the data. W.R.M., D.L., N.K.F., and K.T.  
536 managed the study. W.R.M., and K.T. performed formal analysis of study data, visualized  
537 presentation of the results and drafted the manuscript. All authors amended, critically  
538 reviewed, and commented on the final manuscript.

539

540 **Financial support.** Funding for this study was provided to UMCU and PHE by  
541 GlaxoSmithKline Biologicals SA. GlaxoSmithKline Biologicals SA was provided the  
542 opportunity to review a preliminary version of this paper for factual accuracy, but the authors  
543 are solely responsible for final content and interpretation. The authors received no financial  
544 support or other form of compensation related to the development of the paper.

545

546 **Potential Conflicts of Interest.** K.T. received funds for an unrestricted research grant from  
547 GlaxoSmithKline Biologicals SA, consultation fees, fees for participation in advisory boards,  
548 speaking fees and funds for unrestricted research grants from Pfizer, and fees for  
549 participating in advisory boards from Merck Sharp & Dohme, all paid directly to his home  
550 institution. Except for the funds from GlaxoSmithKline Biologicals SA none was received in  
551 the relation to the work reported here. Public Health England (PHE) has provided vaccine  
552 manufacturers (GSK, Pfizer, Sanofi) with post-marketing surveillance reports on  
553 pneumococcal infection which the companies are required to submit to the UK Licensing  
554 authority in compliance with their Risk Management Strategy. A cost recovery charge is  
555 made for these reports. PHE's Respiratory and Vaccine Preventable Bacteria Reference Unit  
556 has received unrestricted research grants from Pfizer to participate in pneumococcal  
557 surveillance projects.

558

## 559 REFERENCES

- 560 1. O'Brien KL, Wolfson LJ, Watt JP, et al. Burden of disease caused by Streptococcus  
561 pneumoniae in children younger than 5 years: global estimates. *Lancet* **2009**; 374(9693):  
562 893-902.
- 563 2. Welte T, Torres A, Nathwani D. Clinical and economic burden of community-acquired  
564 pneumonia among adults in Europe. *Thorax* **2012**; 67(1): 71-9.
- 565 3. World Health Organization = Organisation mondiale de la S. Pneumococcal conjugate  
566 vaccines in infants and children under 5 years of age: WHO position paper –February 2019   
567 Vaccins antipneumococques conjugués chez les nourrissons et les enfants de moins de 5  
568 ans: note de synthèse de l'OMS – février 2019. *Weekly Epidemiological Record = Relevé*  
569 *épidémiologique hebdomadaire* **2019**; 94(08): 85-103.
- 570 4. Satzke C, Turner P, Virolainen-Julkunen A, et al. Standard method for detecting upper  
571 respiratory carriage of Streptococcus pneumoniae: updated recommendations from the  
572 World Health Organization Pneumococcal Carriage Working Group. *Vaccine* **2013**; 32(1):  
573 165-79.

- 574 5. Bogaert D, De Groot R, Hermans PW. Streptococcus pneumoniae colonisation: the key to  
575 pneumococcal disease. *Lancet Infect Dis* **2004**; 4(3): 144-54.
- 576 6. Wyllie AL, Warren JL, Regev-Yochay G, Givon-Lavi N, Dagan R, Weinberger DM. Serotype  
577 patterns of pneumococcal disease in adults are correlated with carriage patterns in older  
578 children. *Clin Infect Dis* **2020**.
- 579 7. Wyllie AL, Rumke LW, Arp K, et al. Molecular surveillance on Streptococcus pneumoniae  
580 carriage in non-elderly adults; little evidence for pneumococcal circulation independent  
581 from the reservoir in children. *Sci Rep* **2016**; 6: 34888.
- 582 8. Flasche S, Lipsitch M, Ojal J, Pinsent A. Estimating the contribution of different age strata to  
583 vaccine serotype pneumococcal transmission in the pre vaccine era: a modelling study. *BMC*  
584 *Med* **2020**; 18(1): 129.
- 585 9. Berical AC, Harris D, Dela Cruz CS, Possick JD. Pneumococcal Vaccination Strategies. An  
586 Update and Perspective. *Ann Am Thorac Soc* **2016**; 13(6): 933-44.
- 587 10. Auranen K, Rinta-Kokko H, Goldblatt D, et al. Colonisation endpoints in Streptococcus  
588 pneumoniae vaccine trials. *Vaccine* **2013**; 32(1): 153-8.
- 589 11. Weinberger DM, Malley R, Lipsitch M. Serotype replacement in disease after pneumococcal  
590 vaccination. *Lancet* **2011**; 378(9807): 1962-73.
- 591 12. Sleeman KL, Griffiths D, Shackley F, et al. Capsular serotype-specific attack rates and  
592 duration of carriage of Streptococcus pneumoniae in a population of children. *J Infect Dis*  
593 **2006**; 194(5): 682-8.
- 594 13. Weinberger DM, Grant LR, Weatherholtz RC, Warren JL, O'Brien KL, Hammitt LL. Relating  
595 Pneumococcal Carriage Among Children to Disease Rates Among Adults Before and After the  
596 Introduction of Conjugate Vaccines. *Am J Epidemiol* **2016**; 183(11): 1055-62.
- 597 14. Slotved HC. Other age groups than children need to be considered as carriers of  
598 Streptococcal pneumoniae serotypes. *Hum Vaccin Immunother* **2016**; 12(10): 2670-4.
- 599 15. Valente C, de Lencastre H, Sa-Leao R. Selection of distinctive colony morphologies for  
600 detection of multiple carriage of Streptococcus pneumoniae. *Pediatr Infect Dis J* **2013**; 32(6):  
601 703-4.
- 602 16. Krone CL, van de Groep K, Trzcinski K, Sanders EA, Bogaert D. Immunosenescence and  
603 pneumococcal disease: an imbalance in host-pathogen interactions. *Lancet Respir Med*  
604 **2014**; 2(2): 141-53.
- 605 17. Korona-Glowniak I, Niedzielski A, Malm A. Upper respiratory colonization by Streptococcus  
606 pneumoniae in healthy pre-school children in south-east Poland. *Int J Pediatr*  
607 *Otorhinolaryngol* **2011**; 75(12): 1529-34.
- 608 18. Trzcinski K, Bogaert D, Wyllie A, et al. Superiority of trans-oral over trans-nasal sampling in  
609 detecting Streptococcus pneumoniae colonization in adults. *PLoS One* **2013**; 8(3): e60520.
- 610 19. Almeida ST, Pedro T, Paulo AC, de Lencastre H, Sa-Leao R. Re-evaluation of Streptococcus  
611 pneumoniae carriage in Portuguese elderly by qPCR increases carriage estimates and unveils  
612 an expanded pool of serotypes. *Sci Rep* **2020**; 10(1): 8373.
- 613 20. Turner P, Hinds J, Turner C, et al. Improved detection of nasopharyngeal cocolonization by  
614 multiple pneumococcal serotypes by use of latex agglutination or molecular serotyping by  
615 microarray. *J Clin Microbiol* **2011**; 49(5): 1784-9.
- 616 21. Wyllie AL, Chu ML, Schellens MH, et al. Streptococcus pneumoniae in saliva of Dutch primary  
617 school children. *PLoS One* **2014**; 9(7): e102045.
- 618 22. Krone CL, Wyllie AL, van Beek J, et al. Carriage of Streptococcus pneumoniae in aged adults  
619 with influenza-like-illness. *PLoS One* **2015**; 10(3): e0119875.
- 620 23. Wyllie AL, Wijmenga-Monsuur AJ, van Houten MA, et al. Molecular surveillance of  
621 nasopharyngeal carriage of Streptococcus pneumoniae in children vaccinated with  
622 conjugated polysaccharide pneumococcal vaccines. *Sci Rep* **2016**; 6: 23809.
- 623 24. Mielliet WR, van Veldhuizen J, Nicolaie MA, et al. Influenza-like illness exacerbates  
624 Pneumococcal Carriage in Older Adults. *Clin Infect Dis* **2020**.

- 625 25. Carvalho Mda G, Bigogo GM, Junghae M, et al. Potential nonpneumococcal confounding of  
626 PCR-based determination of serotype in carriage. *J Clin Microbiol* **2012**; 50(9): 3146-7.
- 627 26. Carvalho Mda G, Pimenta FC, Moura I, et al. Non-pneumococcal mitis-group streptococci  
628 confound detection of pneumococcal capsular serotype-specific loci in upper respiratory  
629 tract. *PeerJ* **2013**; 1: e97.
- 630 27. Boelsen LK, Dunne EM, Gould KA, et al. The Challenges of Using Oropharyngeal Samples To  
631 Measure Pneumococcal Carriage in Adults. *mSphere* **2020**; 5(4).
- 632 28. Lennon JT, Muscarella ME, Placella SA, Lehmkuhl BK. How, When, and Where Relic DNA  
633 Affects Microbial Diversity. *mBio* **2018**; 9(3).
- 634 29. Vissers M, Wijmenga-Monsuur AJ, Knol MJ, et al. Increased carriage of non-vaccine  
635 serotypes with low invasive disease potential four years after switching to the 10-valent  
636 pneumococcal conjugate vaccine in The Netherlands. *PLoS One* **2018**; 13(3): e0194823.
- 637 30. Southern J, Andrews N, Sandu P, et al. Pneumococcal carriage in children and their  
638 household contacts six years after introduction of the 13-valent pneumococcal conjugate  
639 vaccine in England. *PLoS One* **2018**; 13(5): e0195799.
- 640 31. Watt JP, O'Brien KL, Katz S, et al. Nasopharyngeal versus oropharyngeal sampling for  
641 detection of pneumococcal carriage in adults. *J Clin Microbiol* **2004**; 42(11): 4974-6.
- 642 32. Kapatai G, Sheppard CL, Al-Shahib A, et al. Whole genome sequencing of *Streptococcus*  
643 *pneumoniae*: development, evaluation and verification of targets for serogroup and  
644 serotype prediction using an automated pipeline. *PeerJ* **2016**; 4: e2477.
- 645 33. Carvalho Mda G, Tondella ML, McCaustland K, et al. Evaluation and improvement of real-  
646 time PCR assays targeting *lytA*, *ply*, and *psaA* genes for detection of pneumococcal DNA. *J*  
647 *Clin Microbiol* **2007**; 45(8): 2460-6.
- 648 34. Azzari C, Moriondo M, Indolfi G, et al. Realtime PCR is more sensitive than multiplex PCR for  
649 diagnosis and serotyping in children with culture negative pneumococcal invasive disease.  
650 *PLoS One* **2010**; 5(2): e9282.
- 651 35. Azzari C, Moriondo M, Cortimiglia M, et al. Potential serotype coverage of three  
652 pneumococcal conjugate vaccines against invasive pneumococcal infection in Italian  
653 children. *Vaccine* **2012**; 30(16): 2701-5.
- 654 36. Pimenta FC, Roundtree A, Soysal A, et al. Sequential triplex real-time PCR assay for detecting  
655 21 pneumococcal capsular serotypes that account for a high global disease burden. *J Clin*  
656 *Microbiol* **2013**; 51(2): 647-52.
- 657 37. Nutz S, Doll K, Karlovsky P. Determination of the LOQ in real-time PCR by receiver operating  
658 characteristic curve analysis: application to qPCR assays for *Fusarium verticillioides* and *F.*  
659 *proliferatum*. *Anal Bioanal Chem* **2011**; 401(2): 717-26.
- 660 38. Koo TK, Li MY. A Guideline of Selecting and Reporting Intraclass Correlation Coefficients for  
661 Reliability Research. *J Chiropr Med* **2016**; 15(2): 155-63.
- 662 39. Bland JM, Altman DG. Statistical methods for assessing agreement between two methods of  
663 clinical measurement. *Lancet* **1986**; 1(8476): 307-10.
- 664 40. Altman DG, Bland JM. Interaction revisited: the difference between two estimates. *BMJ*  
665 **2003**; 326(7382): 219.
- 666 41. McHugh ML. Interrater reliability: the kappa statistic. *Biochem Med (Zagreb)* **2012**; 22(3):  
667 276-82.
- 668 42. Landis JR, Koch GG. The measurement of observer agreement for categorical data.  
669 *Biometrics* **1977**; 33(1): 159-74.
- 670 43. Heffron R. *Pneumonia; with Special Reference to Pneumococcus Lobar Pneumonia*: H.  
671 Milford, Oxford University Press, **1939**.
- 672 44. Jansen AG, Rodenburg GD, de Greeff SC, et al. Invasive pneumococcal disease in the  
673 Netherlands: Syndromes, outcome and potential vaccine benefits. *Vaccine* **2009**; 27(17):  
674 2394-401.

- 675 45. Arguedas A, Trzcinski K, O'Brien KL, et al. Upper respiratory tract colonization with  
676 *Streptococcus pneumoniae* in adults. *Expert Rev Vaccines* **2020**: 1-14.
- 677 46. Almeida ST, Paulo AC, Froes F, de Lencastre H, Sa-Leao R. Dynamics of Pneumococcal  
678 Carriage in Adults: A New Look at an Old Paradigm. *J Infect Dis* **2021**; 223(9): 1590-600.
- 679 47. Miellet WR, Mariman R, Pluister G, et al. Detection of *Neisseria meningitidis* in Saliva and  
680 Oropharyngeal Samples from College Students. *bioRxiv* **2021**: 2021.06.09.447670.
- 681 48. Rodrigues F, Christensen H, Morales-Aza B, et al. Viable *Neisseria meningitidis* is commonly  
682 present in saliva in healthy young adults: Non-invasive sampling and enhanced sensitivity of  
683 detection in a follow-up carriage study in Portuguese students. *PLoS One* **2019**; 14(2):  
684 e0209905.
- 685 49. York A, Mbodj S, Yolda-Carr D, Hislop M, Weinberger DM, Wyllie AL. Magnetic Bead-Based  
686 Separation (MBS) of Pneumococcal Serotypes. *bioRxiv* **2021**: 2021.06.06.447277.
- 687 50. Kilian M, Riley DR, Jensen A, Bruggemann H, Tettelin H. Parallel evolution of *Streptococcus*  
688 *pneumoniae* and *Streptococcus mitis* to pathogenic and mutualistic lifestyles. *mBio* **2014**;  
689 5(4): e01490-14.
- 690 51. Kroll JS, Wilks KE, Farrant JL, Langford PR. Natural genetic exchange between *Haemophilus*  
691 and *Neisseria*: intergeneric transfer of chromosomal genes between major human  
692 pathogens. *Proc Natl Acad Sci U S A* **1998**; 95(21): 12381-5.
- 693 52. Price EP, Sarovich DS, Nosworthy E, et al. *Haemophilus influenzae*: using comparative  
694 genomics to accurately identify a highly recombinogenic human pathogen. *BMC Genomics*  
695 **2015**; 16: 641.
- 696 53. Greve T, Moller JK. Accuracy of using the *lytA* gene to distinguish *Streptococcus pneumoniae*  
697 from related species. *J Med Microbiol* **2012**; 61(Pt 4): 478-82.
- 698 54. Tavares DA, Handem S, Carvalho RJ, et al. Identification of *Streptococcus pneumoniae* by a  
699 real-time PCR assay targeting SP2020. *Sci Rep* **2019**; 9(1): 3285.
- 700 55. Pimenta F, Gertz RE, Jr., Park SH, et al. *Streptococcus infantis*, *Streptococcus mitis*, and  
701 *Streptococcus oralis* Strains With Highly Similar *cps5* Loci and Antigenic Relatedness to  
702 Serotype 5 Pneumococci. *Front Microbiol* **2018**; 9: 3199.
- 703 56. Lessa FC, Milucky J, Roupael NG, et al. *Streptococcus mitis* Expressing Pneumococcal  
704 Serotype 1 Capsule. *Sci Rep* **2018**; 8(1): 17959.
- 705 57. Huebner RE, Dagan R, Porath N, Wasas AD, Klugman KP. Lack of utility of serotyping multiple  
706 colonies for detection of simultaneous nasopharyngeal carriage of different pneumococcal  
707 serotypes. *Pediatr Infect Dis J* **2000**; 19(10): 1017-20.
- 708 58. Numminen E, Cheng L, Gyllenberg M, Corander J. Estimating the transmission dynamics of  
709 *Streptococcus pneumoniae* from strain prevalence data. *Biometrics* **2013**; 69(3): 748-57.
- 710 59. Shafeeq S, Kuipers OP, Kloosterman TG. Cellobiose-mediated gene expression in  
711 *Streptococcus pneumoniae*: a repressor function of the novel GntR-type regulator BguR.  
712 *PLoS One* **2013**; 8(2): e57586.

713



**Figure 1.** (A) Matrix layout for observed intersections of the *Streptococcus pneumoniae* detection procedures applied to n=1549 nasopharyngeal samples, sorted by size. (B) Matrix layout for observed intersections of the *S. pneumoniae* detection procedures applied to nasopharyngeal and oropharyngeal samples from n=319 adults sampled in the Netherlands, sorted by size. Circles in the matrix indicate sets that are part of the intersection, and circles are coloured by sample type with nasopharyngeal and oropharyngeal samples coloured in green and blue, respectively. The bar diagram displaying the intersection size is coloured using the same scheme, with orange indicating an intersection that represents positivity in both sample types.

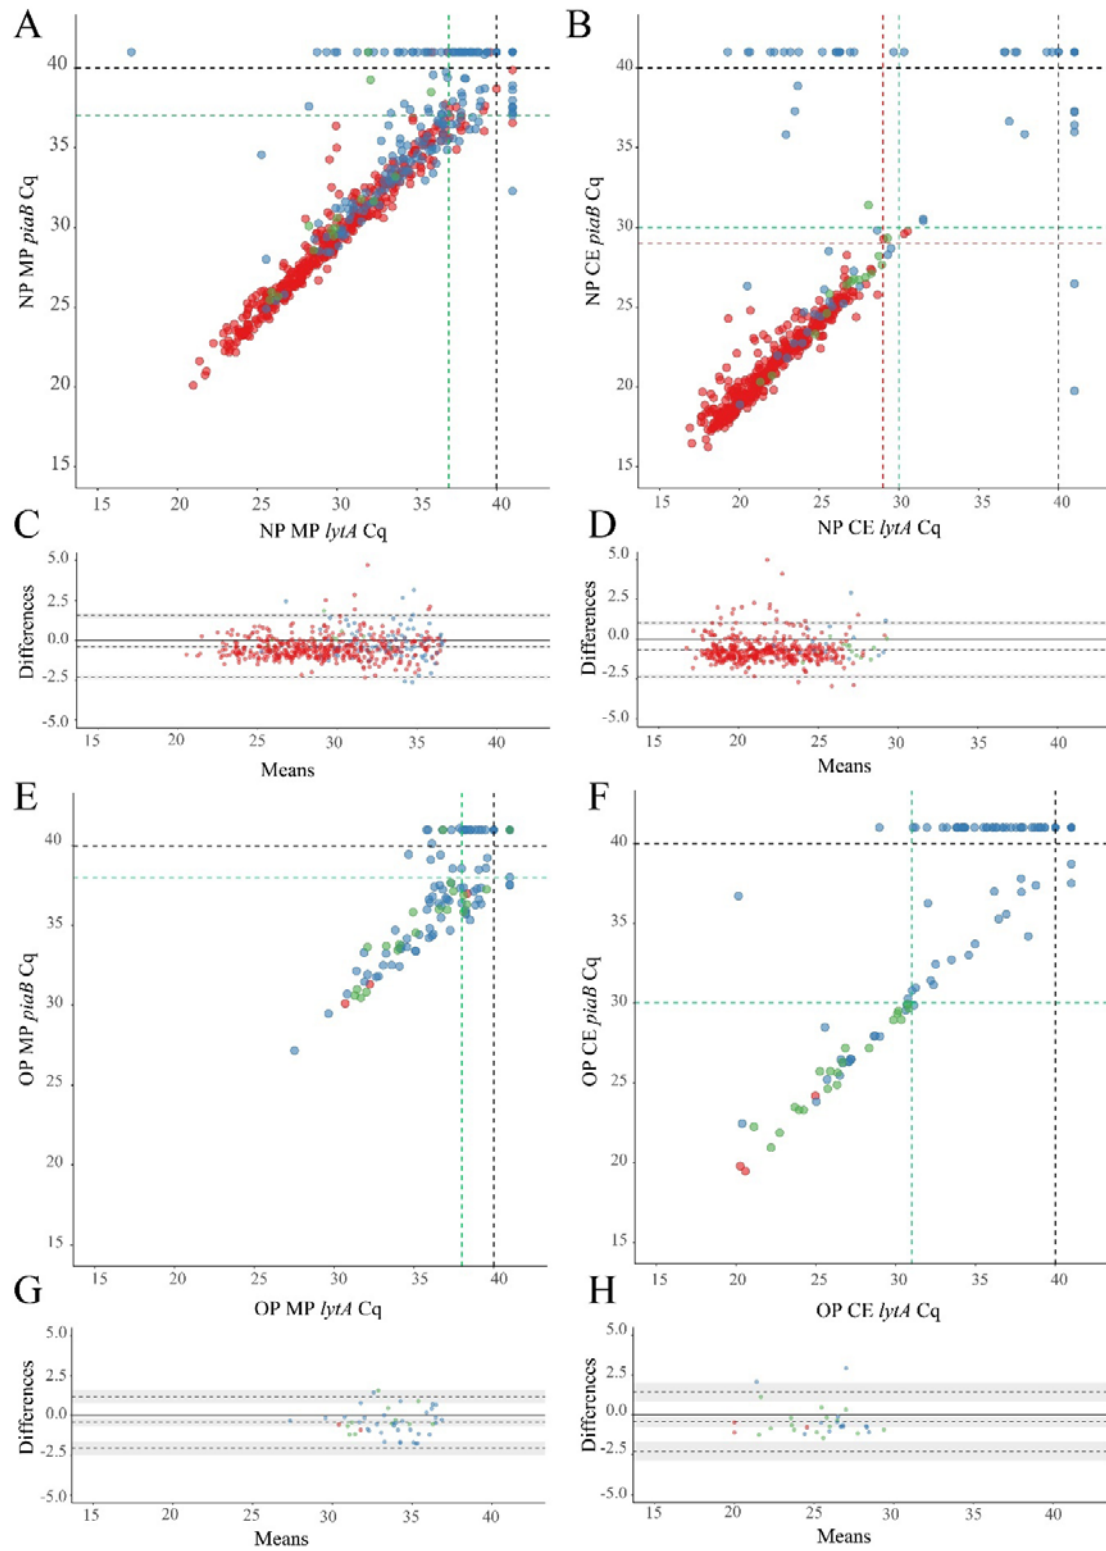

**Figure 2.** Scatter plots (**A**, **B**, **E** and **F**) displaying correlation between cycle threshold ( $C_q$ ) from real-time PCR assays targeting the *Streptococcus pneumoniae* genes *piaB* and *lytA* for minimally processed (**A** and **E**) and culture-enriched (**B** and **F**) nasopharyngeal (**A** and **B**) and oropharyngeal (**E** and **F**) samples followed by the Bland-Altman plots (**C**, **D**, **G** and **H**) displaying agreement between *piaB* and *lytA* for samples positive with minimally processed (**C** and **G**) and culture-enriched (**D** and **H**)  $^{ROCD}C_q$  criteria in nasopharyngeal (**C** and **D**) and oropharyngeal (**G** and **H**) samples. The shaded grey areas mark the 95% confidence interval of the upper limit of agreement, bias and lower limit of agreement. The Bland-Altman plots show the absence of systematic bias between *piaB* and *lytA* because the line of equality (grey solid line) is within the limits of agreement. Bias between *piaB* and *lytA* is more often observed in high  $C_q$  samples. Primary culture-positive and qPCR-guided culture-positive samples are indicated with red and green dots, respectively. Culture-negative samples are indicated with blue dots. In panels **A**, **B**, **E** and **F** black dashed lines indicate the arbitrary  $C_q$  criterium ( $<40 C_q$ ), green dashed lines indicate  $^{ROCD}C_q$  criteria derived by validating qPCR results with primary and qPCR-guided cultures results, and red dashed lines in panels **A** and **B** indicate  $^{ROCD}C_q$  criteria derived by validating qPCR results with primary culture alone.



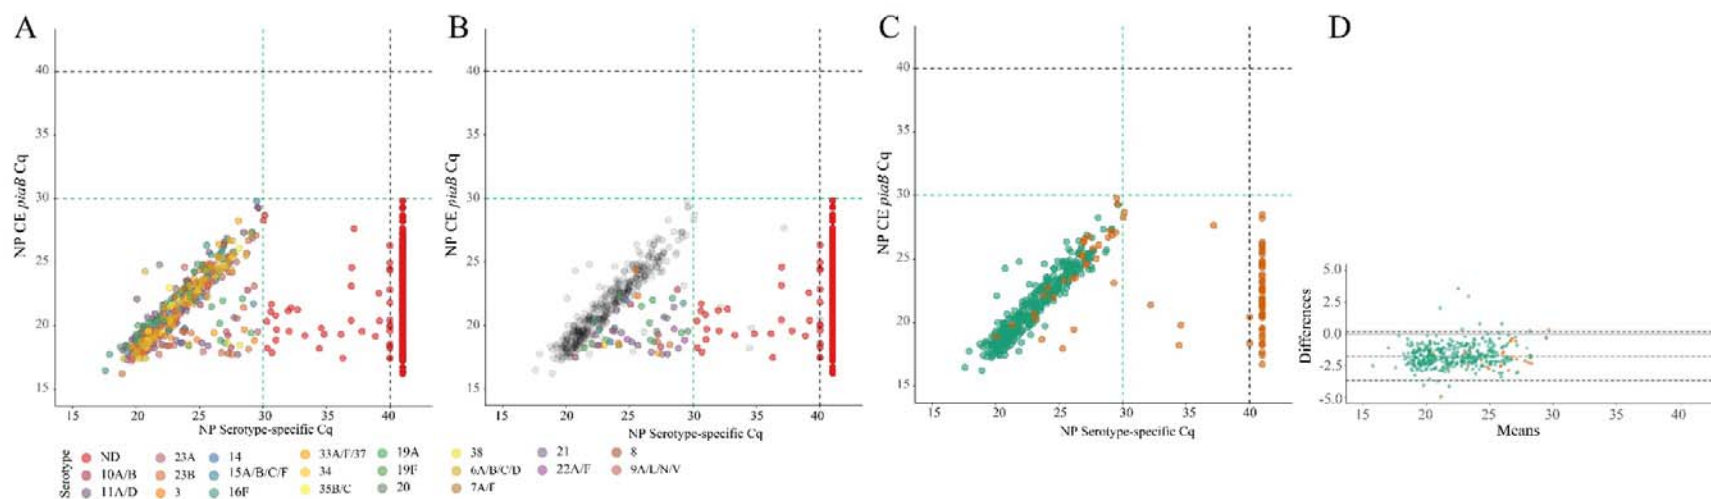

**Figure 3** Scatter plots (A-C) displaying correlation between cycle threshold (C<sub>q</sub>) from real-time PCR (qPCR) assays targeting the *Streptococcus pneumoniae* *piaB* and serotype/serogroup specific signal detected with qPCR for nasopharyngeal samples classified positive for *S. pneumoniae* according to <sup>ROC</sup>C<sub>q</sub> criterion (green dashed lines). Bland-Altman plot (D) displaying agreement between *piaB* and dominant serotype detected by qPCR. Each dot represents an individual serotype carriage event detected by qPCR in culture-enriched nasopharyngeal sample (A-C). Dots in panel A depicts serotypes detected with qPCR. Dots are color-coded according to serotypes/serogroup targeted in an assay (see legend). Colour dots in panel B depict subdominant serotypes detected qPCR while grey dots mark dominant serotypes. Red dots in panel A and B depict samples not generating any signal in serotype/serogroup-specific qPCRs or with the signal of C<sub>q</sub> higher than the <sup>ROC</sup>C<sub>q</sub> threshold, hence classified as negative for a serotype. In panels C and D green dots mark samples with congruent serotype between culture and molecular methods and orange dots mark samples with noncongruent result. In panel D shaded grey areas mark the 95% confidence interval of the upper limit of agreement, bias and lower limit of agreement. The solid line grey line marks the line of equality.

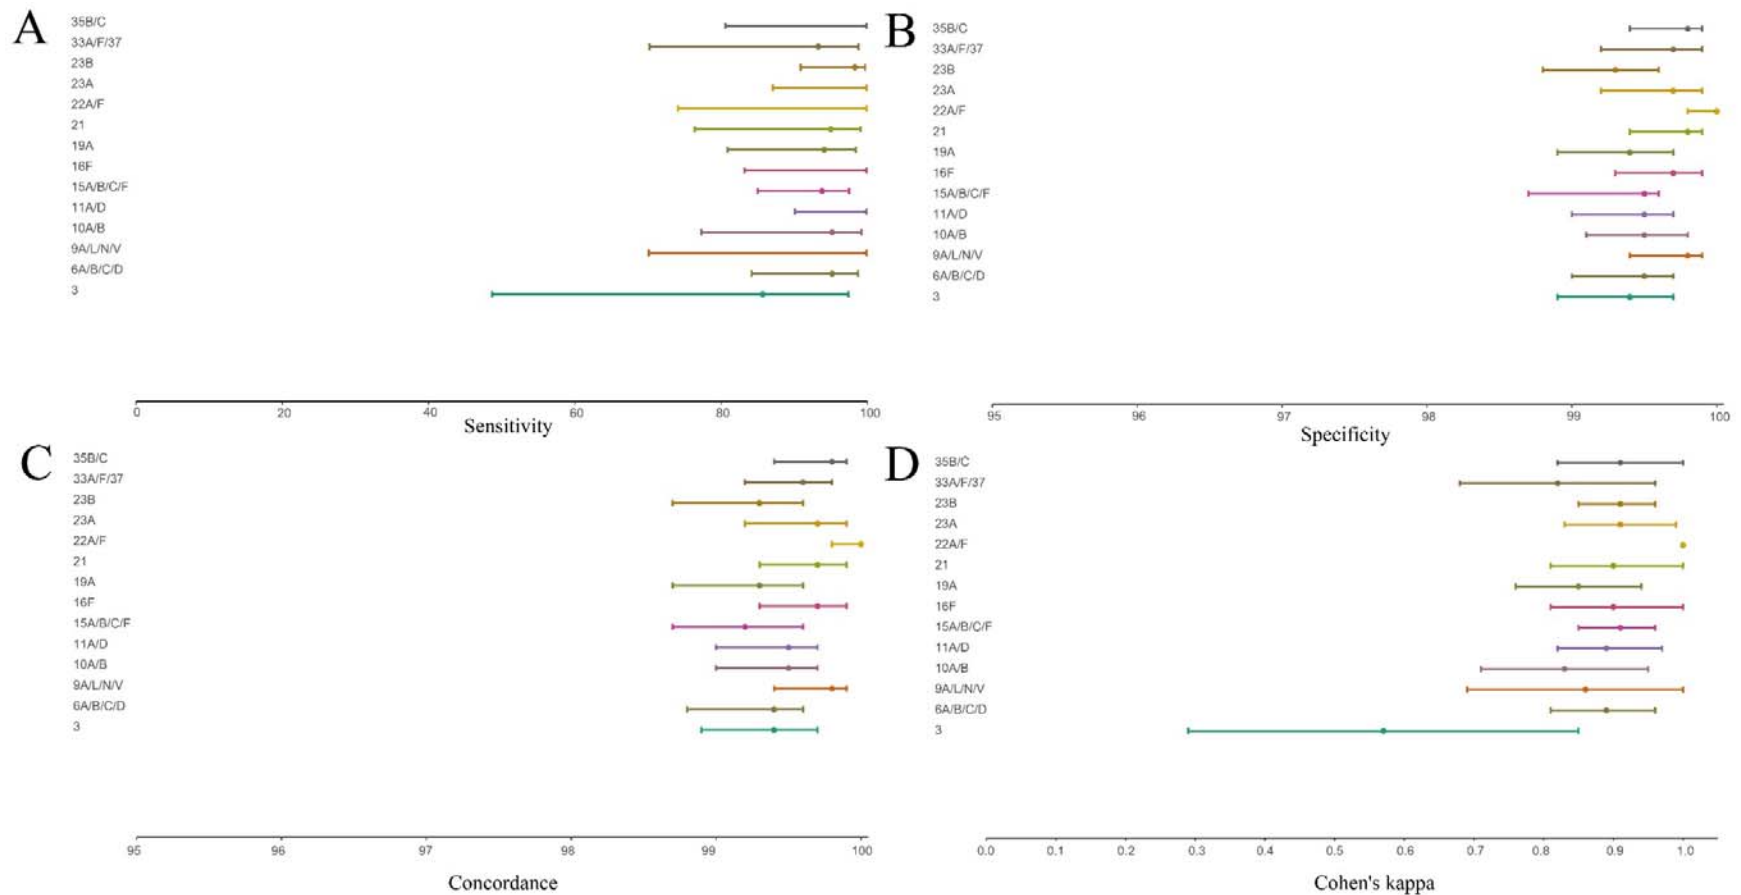

**Figure 4.** Forest plot displaying the point estimate and 95% confidence of intervals sensitivity (A), specificity (B), concordance (C) and Cohen's kappa (D) for molecular diagnostic tests applied to culture-enriched samples when compared to isolation of *S. pneumoniae* strains of particular serotype/serogroup from nasopharyngeal swabs collected in the study. Graphs displayed results for serotypes/serogroups that have been cultured from >5 nasopharyngeal samples.

It is made available under a [CC-BY-NC-ND 4.0 International license](https://creativecommons.org/licenses/by-nc-nd/4.0/) .

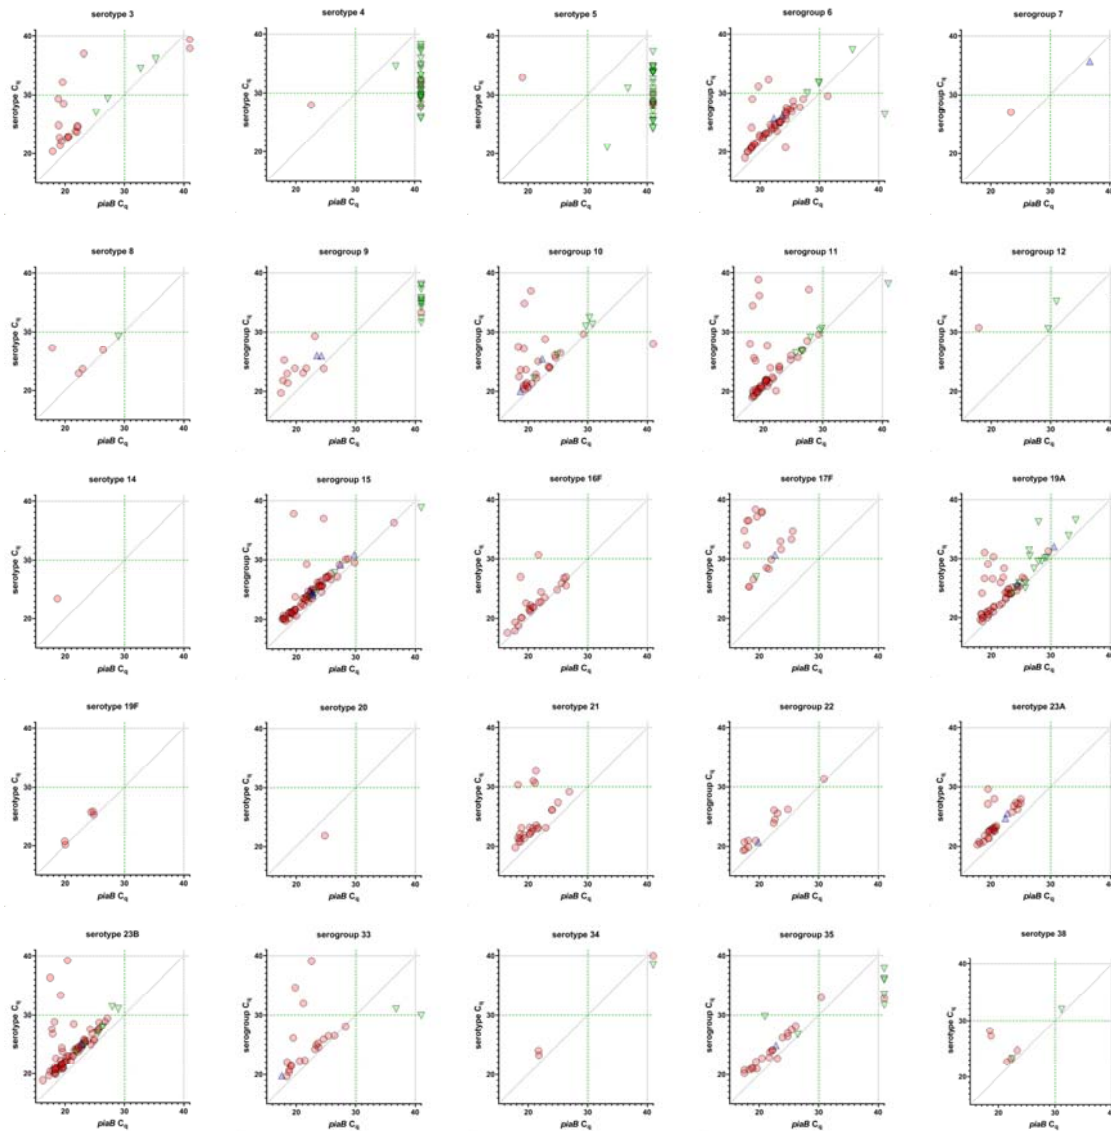

**Supplementary Figure S1.** Results of molecular method based quantification of serogroups/serotypes-specific sequences in DNA from culture-enriched nasopharyngeal and oropharyngeal samples. Individual scatter plots depict results of a single serotype-specific or serogroup-specific qPCR assay as labelled above the panel. Each symbol represents an individual sample: pale-red dots represent nasopharyngeal samples from children; blue triangles and green triangles represent nasopharyngeal and oropharyngeal samples from adults, respectively. Sample was classified as positive for a serotype/serogroup with molecular method when the signal detected by qPCR for *piab* (X-axis) and serotype/serogroup (Y-axis) were both below the  $^{ROCD}C_q$  cut-off threshold of 30  $C_q$ . Only samples that generated a signal of  $C_q < 40$  in a particular serogroup/serotype-specific qPCR are depicted. Symbols of  $C_q > 40$  for *piab* depict individual samples or pools of samples negative for pneumococcus by qPCR. None of the samples generated any signal in qPCRs targeting serotype 1, serotype 23F and serogroup 18. In addition, no samples were identified as positive for serogroup 12 according to study criteria.

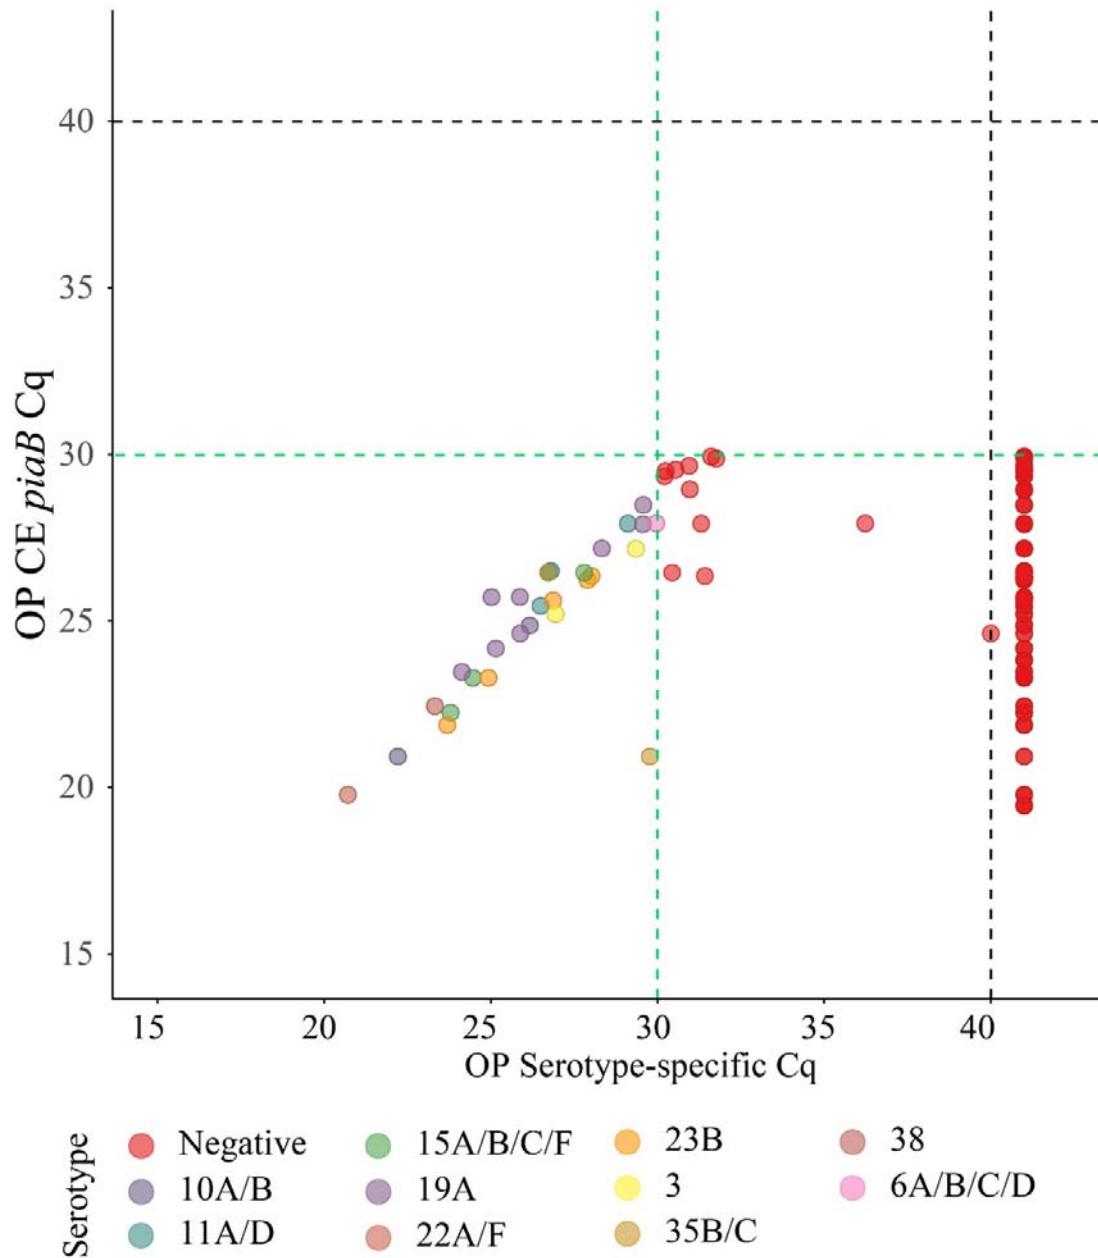

**Supplementary Figure S2.** Scatter plot displaying correlation between cycle threshold ( $C_q$ ) from real-time PCR (qPCR) assays targeting the *Streptococcus pneumoniae piaB* and serotype/serogroup specific signal detected with qPCR for culture-enriched (CE) oropharyngeal samples from adults classified positive for *S. pneumoniae* according to  $^{ROC}C_q$  criterium (green dashed lines). Dots depicts serotypes detected with qPCR. Dots are color-coded according to serotypes/serogroup targeted in an assay (see legend).

**Table 1.** Optimal qPCR cycle threshold  $C_q$  and corresponding parameters for *Streptococcus pneumoniae* carriage detection in nasopharyngeal (n=1549) and oropharyngeal (n=319) samples. Results from qPCR were validated in a receiver operating characteristic curve analysis with culture as reference.

| Parameter           | Sample | Reference                   | Optimal threshold<br><i>piaB</i><br>(95% CI) | Youden index<br><i>piaB</i> | Sensitivity<br><i>piaB</i> | Specificity<br><i>piaB</i> | Optimal threshold<br><i>lytA</i><br>(95% CI) | Youden index<br><i>lytA</i> | Sensitivity<br><i>lytA</i> | Specificity<br><i>lytA</i> |
|---------------------|--------|-----------------------------|----------------------------------------------|-----------------------------|----------------------------|----------------------------|----------------------------------------------|-----------------------------|----------------------------|----------------------------|
| Minimally processed | NP     | Primary cultures            | 37.13<br>(36.49 – 37.76)                     | 0.85                        | 0.95                       | 0.90                       | 37.47<br>(36.44 – 38.39)                     | 0.82                        | 0.94                       | 0.87                       |
|                     | NP     | Primary culture & reculture | 37.21<br>(36.51 – 38.46)                     | 0.85                        | 0.95                       | 0.90                       | 37.29<br>(36.52 – 38.61)                     | 0.83                        | 0.94                       | 0.89                       |
|                     | OP     | Primary culture & reculture | 38.73<br>(37.29 – 39.39)                     | 0.69                        | 0.91                       | 0.78                       | 37.47<br>(36.52 – 37.66)                     | 0.69                        | 0.87                       | 0.82                       |
| Culture-enriched    | NP     | Primary cultures            | 28.71<br>(26.59 – 29.69)                     | 0.94                        | 0.98                       | 0.97                       | 29.19<br>(27.41 – 30.25)                     | 0.93                        | 0.98                       | 0.95                       |
|                     | NP     | Primary culture & reculture | 30.26<br>(29.91 – 30.47)                     | 0.96                        | 0.98                       | 0.98                       | 29.99<br>(28.91 – 30.47)                     | 0.94                        | 0.98                       | 0.96                       |
|                     | OP     | Primary culture & reculture | 29.78<br>(28.84 – 29.93)                     | 0.91                        | 0.96                       | 0.95                       | 30.73<br>(29.42 – 30.81)                     | 0.85                        | 0.91                       | 0.94                       |

With *S. pneumoniae* isolated from only three samples there was insufficient statistical power to perform the receiver operating characteristic curve analysis on oropharyngeal samples with primary cultures as a reference.

**Table 2.** The accuracy of *Streptococcus pneumoniae* detection in n=1549 nasopharyngeal samples from children (n=946) and adults (n=603) tested using conventional diagnostic culture and molecular methods applied to DNA extracted from minimally processed and culture-enriched samples and applying  $^{ROCD}C_q$  thresholds for a sample positivity in qPCRs. Measures of diagnostic accuracy were calculated by comparing the number of detected samples positive per method with the number of (n=460 for all individuals, and n=437 and n=23 for nasopharyngeal samples from children and adults, respectively) individuals positive for *S. pneumoniae* based on isolation of live pneumococcus either from the primary diagnostic or qPCR-guided culture.

| Method                               | Study population | Percent (n) of positive samples (95%CI) | PPV % (95%CI)         | NPV % (95%CI)         | Sensitivity % (95%CI) | Specificity % (95%CI) | Concordance % (95%CI) | $\kappa$ (95%CI)      |
|--------------------------------------|------------------|-----------------------------------------|-----------------------|-----------------------|-----------------------|-----------------------|-----------------------|-----------------------|
| primary culture                      | All              | 28.7 (445)<br>(26.5 – 31.0)             | 100<br>(99.1 – 100)   | 98.6<br>(97.8 – 99.2) | 96.7<br>(94.7 – 98.0) | 100<br>(99.6 – 100)   | 99.0<br>(98.4 – 99.4) | 0.98<br>(0.96 – 0.99) |
|                                      | Children         | 44.6 (422)<br>(41.5 – 47.8)             | 100<br>(99.1 – 100)   | 97.1<br>(95.3 – 98.3) | 96.6<br>(94.4 – 97.9) | 100<br>(99.3 – 100)   | 98.4<br>(97.4 – 99.0) | 0.97<br>(0.95 – 0.98) |
|                                      | Adults           | 3.8 (23)<br>(2.6 – 5.7)                 | 100<br>(85.7 – 100)   | 100<br>(99.3 – 100)   | 100<br>(85.7 – 100)   | 100<br>(99.3 – 100)   | 100<br>(99.4 – 100)   | 1                     |
| qPCRs on minimally processed samples | All              | 33.1 (512)<br>(30.8 – 35.4)             | 83.2<br>(79.7 – 86.2) | 96.7<br>(95.5 – 97.6) | 92.6<br>(89.8 – 94.7) | 92.1<br>(90.3 – 93.6) | 92.3<br>(90.8 – 93.5) | 0.82<br>(0.79 – 0.85) |
|                                      | Children         | 51.7 (489)<br>(48.5 – 54.9)             | 83.6<br>(80.1 – 86.7) | 93.9<br>(91.3 – 95.7) | 93.6<br>(90.9 – 95.5) | 84.3<br>(80.9 – 87.2) | 88.6<br>(86.4 – 90.5) | 0.77<br>(0.73 – 0.81) |
|                                      | Adults           | 3.8 (23)<br>(2.6 – 5.7)                 | 73.9<br>(53.5 – 87.5) | 99.0<br>(97.8 – 99.5) | 73.9<br>(53.5 – 87.5) | 99.0<br>(97.8 – 99.5) | 98.0<br>(96.6 – 98.9) | 0.73<br>(0.58 – 0.88) |
| qPCRs on culture-enriched samples    | All              | 30.3 (469)<br>(28.0 – 32.6)             | 95.7<br>(93.5 – 97.2) | 99.0<br>(98.2 – 99.4) | 97.6<br>(95.8 – 98.7) | 98.2<br>(97.2 – 98.8) | 98.0<br>(97.2 – 98.6) | 0.95<br>(0.94 – 0.97) |
|                                      | Children         | 47.3 (447)<br>(44.1 – 50.4)             | 96.0<br>(93.7 – 97.4) | 98.4<br>(96.9 – 99.2) | 98.2<br>(96.4 – 99.1) | 96.5<br>(94.5 – 97.8) | 97.3<br>(96.0 – 98.1) | 0.94<br>(0.92 – 0.97) |
|                                      | Adults           | 3.7 (22)<br>(2.4 – 5.5)                 | 90.9<br>(72.2 – 97.5) | 99.5<br>(98.5 – 99.8) | 87.0<br>(67.9 – 95.5) | 99.7<br>(98.8 – 99.9) | 99.2<br>(98.1 – 99.6) | 0.88<br>(0.78 – 0.99) |

PPV – positive predictive value; NPV – negative predictive value; 95%CI – 95% confidence interval;  $\kappa$  – Cohen’s kappa where  $\leq 0$ , 0.01-0.20, 0.21-0.40, 0.41-0.60, 0.61-0.80,  $>0.81$  are interpreted as poor agreement, slight, fair, moderate, substantial, and almost perfect agreement, respectively.

**Table 3.** The accuracy of *Streptococcus pneumoniae* detection in paired nasopharyngeal and oropharyngeal samples from n=319 adults tested using molecular methods applied to DNA extracted from minimally processed and culture-enriched samples and applying  $ROC_d C_q$  thresholds for a sample positivity in qPCRs. Measures of diagnostic accuracy were calculated by comparing the number of detected samples positive per method with the overall number of n=37 individuals identified as carriers of *S. pneumoniae* based on isolation of live pneumococcus either at the primary diagnostic or qPCR-guided culture and either from nasopharyngeal or oropharyngeal sample.

| Method                               | Positivity in   | Percent (n) of positive samples<br>(95%CI) | PPV %<br>(95%CI)      | NPV %<br>(95%CI)      | Sensitivity %<br>(95%CI) | Specificity %<br>(95%CI) | Concordance %<br>(95%CI) | $\kappa$<br>(95%CI)    |
|--------------------------------------|-----------------|--------------------------------------------|-----------------------|-----------------------|--------------------------|--------------------------|--------------------------|------------------------|
| Primary culture alone                | NP              | 4.7 (15)<br>(2.9 – 7.6)                    | 100<br>(79.6 – 100)   | 92.8<br>(89.3 – 95.2) | 40.5<br>(26.3 – 56.5)    | 100<br>(98.7 – 100)      | 93.1<br>(89.8 – 95.4)    | 0.55<br>(0.36 – 0.73)  |
|                                      | OP              | 0.9 (3)<br>(0.3 – 0.7)                     | 100<br>(43.9 – 100)   | 89.2<br>(85.3 – 92.2) | 8.1<br>(2.8 – 21.3)      | 100<br>(98.7 – 100)      | 89.3<br>(85.5 – 92.3)    | 0.13<br>(-0.14 – 0.41) |
|                                      | either NP or OP | 5.6 (18)<br>(3.6 – 8.7)                    | 100<br>(82.4 – 100)   | 93.7<br>(90.4 – 95.9) | 48.6<br>(33.4 – 64.1)    | 100<br>(98.7 – 100)      | 94.0<br>(90.9 – 96.2)    | 0.63<br>(0.46 – 0.79)  |
| qPCRs on minimally processed samples | NP              | 4.7 (15)<br>(2.9 – 7.6)                    | 73.3<br>(48.0 – 89.1) | 91.4<br>(87.8 – 94.1) | 29.7<br>(17.5 – 45.8)    | 98.6<br>(96.4 – 99.4)    | 90.6<br>(86.9 – 93.3)    | 0.38<br>(0.17 – 0.59)  |
|                                      | OP              | 15.7 (50)<br>(12.1 – 20.1)                 | 34.0<br>(22.4 – 47.8) | 92.6<br>(88.8 – 95.1) | 45.9<br>(31.0 – 61.6)    | 88.3<br>(84.0 – 91.5)    | 83.4<br>(78.9 – 87.1)    | 0.30<br>(0.12 – 0.47)  |
|                                      | either NP or OP | 19.1 (61)<br>(15.2 – 23.8)                 | 41.0<br>(29.5 – 53.5) | 95.3<br>(92.0 – 97.3) | 67.6<br>(51.5 – 80.4)    | 87.2<br>(82.8 – 90.6)    | 85.0<br>(80.6 – 88.5)    | 0.43<br>(0.28 – 0.58)  |
| qPCRs on culture-enriched samples    | NP              | 4.7 (15)<br>(2.9 – 7.6)                    | 86.7<br>(62.1 – 96.3) | 92.1<br>(88.5 – 94.6) | 35.1<br>(21.8 – 51.2)    | 99.3<br>(88.3 – 94.4)    | 91.8<br>(88.3 – 94.4)    | 0.46<br>(0.27 – 0.66)  |
|                                      | OP              | 12.2 (39)<br>(9.1 – 16.3)                  | 61.5<br>(45.9 – 75.1) | 95.4<br>(92.2 – 97.3) | 64.9<br>(48.8 – 78.2)    | 94.7<br>(91.4 – 96.8)    | 91.2<br>(87.6 – 93.9)    | 0.58<br>(0.43 – 0.73)  |
|                                      | either NP or OP | 16.3 (52)<br>(12.7 – 20.8)                 | 67.5<br>(53.8 – 78.5) | 99.3<br>(97.3 – 99.8) | 94.6<br>(82.3 – 98.5)    | 94.0<br>(90.6 – 96.2)    | 94.0<br>(90.9 – 96.2)    | 0.75<br>(0.65 – 0.86)  |

NP – nasopharyngeal; OP – oropharyngeal; PPV – positive predictive value; NPV – negative predictive value; 95%CI – 95% confidence interval;  $\kappa$  – Cohen’s kappa where  $\leq 0$ , 0.01-0.20, 0.21-0.40, 0.41-0.60, 0.61-0.80,  $>0.81$  are interpreted as poor agreement, slight, fair, moderate, substantial, and almost perfect agreement, respectively.

**Table 4.** The accuracy of *Streptococcus pneumoniae* serotype detection in n=1549 nasopharyngeal samples from children (n=946) and adults (n=603) tested using molecular methods applied to DNA extracted culture-enriched samples. Measures of diagnostic accuracy were calculated by comparing the numbers of serotype carriage events detected with molecular methods with n=393 samples from which serotypes were cultured that were targeted by serotype-specific qPCR assays.

| study population    | PPV<br>%<br>(95%CI)   | NPV<br>%<br>(95%CI)   | Sensitivity<br>%<br>(95%CI) | Specificity<br>%<br>(95%CI) | Concordance<br>%<br>(95%CI) | $\kappa$<br>(95%CI)   |
|---------------------|-----------------------|-----------------------|-----------------------------|-----------------------------|-----------------------------|-----------------------|
| all<br>(n=1549)     | 100<br>(99.0 – 100)   | 98.7<br>(97.9 – 99.2) | 96.2<br>(93.8 – 97.7)       | 100<br>(99.7 – 100)         | 99.0<br>(99.7 – 100)        | 0.97<br>(0.96 – 0.99) |
| children<br>(n=946) | 98.1<br>(96.6 – 98.9) | 98.1<br>(96.6 – 98.9) | 97.1<br>(94.8 – 98.4)       | 100<br>(99.3 – 100)         | 98.8<br>(97.9 – 99.3)       | 0.98<br>(0.96 – 0.99) |
| adults<br>(n=603)   | 100<br>(78.5 – 100)   | 99.3<br>(98.3 – 99.7) | 77.8<br>(54.8 – 91.0)       | 100<br>(99.3 – 100)         | 99.3<br>(98.3 – 99.7)       | 0.87<br>(0.75 – 1)    |

PPV – positive predictive value; NPV – negative predictive value; 95%CI – 95% confidence interval;  $\kappa$  – Cohen’s Kappa where  $\leq 0$ , 0.01-0.20, 0.21-0.40, 0.41-0.60, 0.61-0.80,  $> 0.81$  are interpreted as poor agreement, slight, fair, moderate, substantial, and almost perfect agreement, respectively.



**Supplementary Table S1.** Methodological differences between *Streptococcus pneumoniae* carriage studies conducted in the Netherlands and in England.

| Processing step                        | The Netherlands                                                               | England                                                                                      |
|----------------------------------------|-------------------------------------------------------------------------------|----------------------------------------------------------------------------------------------|
| transport medium                       | 1 ml Amies                                                                    | 1 ml STGG                                                                                    |
| transport temperature                  | ambient                                                                       | 2-8°C                                                                                        |
| duration of transport                  | <8 hours                                                                      | <48 hours                                                                                    |
| arrival to the diagnostic lab          | culturing on receipt                                                          | storage at -80°C                                                                             |
| culture medium                         | BA-GENT and CBA                                                               | COBA and CBA                                                                                 |
| inoculum volume                        | 35 ul                                                                         | 50 ul                                                                                        |
| identification of <i>S. pneumoniae</i> | optochin-susceptibility & bile solubility tests                               | bioinformatics-based method applied to bacterial DNA                                         |
| minimally processed (MP) sample        | an aliquot of Amies stored at -80°C                                           | an aliquot of skim milk tryptone glucose and glycerine broth medium (STGG) stored at -80°C   |
| culture-enriched (CE) sample           | whole BA-GENT plate colony growth washed with 2.1 ml of BHI with 10% glycerol | swab of $\alpha$ -haemolytic colonies from COBA (first choice) or CBA, and into 1 ml of STGG |

STGG: skim milk tryptone glucose and glycerine broth medium, CBA: Columbia blood agar plate, BA-GENT: blood agar plate gentamycin, COBA: blood agar plate with Streptococcus selective medium.

**Supplementary Table S2.** Results of an intraclass correlation coefficient (ICC) reliability analysis for  $^{ROCD}C_q$ -based criteria in a subset of samples classified as positive for *S. pneumoniae* according to the  $^AC_q$  criterium of <40.

| Sample                             | $C_q$ score   | Number of samples | ICC<br>(95% CI)        | p-value  |
|------------------------------------|---------------|-------------------|------------------------|----------|
| Minimally processed nasopharyngeal | $<^{ROCD}C_q$ | 512               | 0.96<br>(0.94-0.97)    | < 0.0001 |
|                                    | $>^{ROCD}C_q$ | 49                | -0.15<br>(-0.42-0.14)  | 0.845    |
| Culture-enriched nasopharyngeal    | $<^{ROCD}C_q$ | 469               | 0.92<br>(0.73-0.97)    | < 0.0001 |
|                                    | $>^{ROCD}C_q$ | 10                | -0.19<br>(-0.59-0.41)  | 0.751    |
| Minimally processed oropharyngeal  | $<^{ROCD}C_q$ | 59                | 0.96<br>(0.93-0.97)    | < 0.0001 |
|                                    | $>^{ROCD}C_q$ | 24                | -0.323<br>(-0.62-0.08) | 0.947    |
| Culture-enriched oropharyngeal     | $<^{ROCD}C_q$ | 39                | 0.99<br>(0.99-1)       | < 0.0001 |
|                                    | $>^{ROCD}C_q$ | 19                | 0.31<br>(-0.19-0.66)   | 0.104    |

ICC: intraclass correlation coefficient - a single score intraclass correlation coefficient with two-way model was used for reliability analysis. ICC values <0.50, 0.50-0.75, 0.75-0.90 and >0.90 are indicative of poor, moderate, good, and excellent reliability, respectively.

**Supplementary Table S3. Number of serotypes/serogroups detected with any method.**

| <b>number of detected serotypes</b> | <b>nasopharyngeal samples from children<br/>n (%)</b> | <b>nasopharyngeal samples from adults<br/>n (%)</b> |
|-------------------------------------|-------------------------------------------------------|-----------------------------------------------------|
| 0                                   | 543 (57.4)                                            | 583 (96.7)                                          |
| 1 <sup>#</sup>                      | 357 (37.7)                                            | 19 (3.2)                                            |
| 2                                   | 40 (4.2)                                              | 1 (0.2)                                             |
| 3                                   | 4 (0.4)                                               | 0 (-)                                               |
| 4                                   | 1 (0.1)                                               | 0 (-)                                               |
| 5                                   | 1 (0.1)                                               | 0 (-)                                               |

<sup>#</sup> - includes samples pneumococcus-positive in qPCR with no signal for any serotype

**Table S4.** Optimal qPCR cycle threshold  $C_q$  and corresponding parameters for *Streptococcus pneumoniae* carriage detection in a subset of nasopharyngeal (n=176) and oropharyngeal (n=100) samples processed independently in England and in the Netherlands. Results from qPCR were validated in a receiver operating characteristic curve analysis with culture as reference\*.

| Sample | Target      | ICC<br>(95% CI)       | England                       |              |             |             | Netherlands                   |              |             |             |
|--------|-------------|-----------------------|-------------------------------|--------------|-------------|-------------|-------------------------------|--------------|-------------|-------------|
|        |             |                       | Optimal threshold<br>(95% CI) | Youden index | Sensitivity | Specificity | Optimal threshold<br>(95% CI) | Youden index | Sensitivity | Specificity |
| MP NP  | <i>piaB</i> | 0.76<br>(0.64 – 0.84) | 37.85<br>(35.05 – 39.25)      | 0.66         | 0.81        | 0.85        | 36.99<br>(35.92 – 37.44)      | 0.94         | 0.96        | 0.98        |
| MP NP  | <i>lytA</i> | 0.79<br>(0.69 – 0.85) | 36.77<br>(34.33 – 37.34)      | 0.66         | 0.78        | 0.88        | 35.17<br>(32.6 – 36.74)       | 0.73         | 0.85        | 0.88        |
| CE NP  | <i>piaB</i> | 0.82<br>(0.56 – 0.91) | 24.30<br>(21.61 – 28.87)      | 0.86         | 0.95        | 0.91        | 27.51<br>(24.12 – 29.26)      | 0.96         | 0.99        | 0.97        |
| CE NP  | <i>lytA</i> | 0.86<br>(0.52 – 0.94) | 26.51<br>(22.09 – 30.01)      | 0.81         | 0.96        | 0.85        | 25.47<br>(24.36 – 27.93)      | 0.91         | 0.96        | 0.95        |
| CE OP  | <i>piaB</i> | 0.78<br>(0.62 – 0.87) | 28.71<br>(26.36 – 29.11)      | 0.75         | 0.89        | 0.86        | 29.43<br>(26.72 – 29.64)      | 0.74         | 0.89        | 0.85        |
| CE OP  | <i>lytA</i> | 0.87<br>(0.81 – 0.91) | 31.50<br>(28.65 – 32.59)      | 0.77         | 0.89        | 0.88        | 30.28<br>(27.50 – 30.77)      | 0.72         | 0.89        | 0.83        |

MP: minimally processed; CE: culture-enriched; NP: nasopharyngeal; OP: oropharyngeal. 95%CI – 95% confidence interval.

\*Consents given by study participants in the Netherlands were not explicit about export of minimally processed samples outside the country. Consequently, detection of pneumococcus in minimally processed samples collected in the Netherlands could not be performed independently in England and results of culture (primary and qPCR-guided) in the country of samples origin, England for NP and the Netherlands for OP samples, were used as the references.

**Table S5.** The accuracy of *Streptococcus pneumoniae* detection in n=176 nasopharyngeal samples and n=59 oropharyngeal tested independently in both countries using molecular methods applied to DNA extracted from minimally processed and culture-enriched samples and applying  $ROC^d C_q$  thresholds for a sample positivity in qPCRs. Measures of diagnostic accuracy were calculated by comparing the number of detected nasopharyngeal and oropharyngeal samples positive per method with the number of individuals positive for *S. pneumoniae* based on isolation of live pneumococcus either from the primary diagnostic or qPCR-guided culture (n=101 of nasopharyngeal samples culture-positive in UK and n=19 oropharyngeal samples culture-positive in the Netherlands).

| Method                                  | Percent (n) of samples tested positive in the Netherlands<br>(95%CI) | Percent (n) of samples tested positive in England<br>(95%CI) | Concordance %<br>(95%CI) | $\kappa$<br>(95%CI)   |
|-----------------------------------------|----------------------------------------------------------------------|--------------------------------------------------------------|--------------------------|-----------------------|
| qPCRs on minimally processed NP samples | 42.0 (74)<br>(35.0 – 49.4)                                           | 54.5 (96)<br>(47.2 – 61.7)                                   | 83.0<br>(76.7 – 87.8)    | 0.66<br>(0.55 – 0.77) |
| qPCRs on culture-enriched NP samples    | 59.1 (104)<br>(51.7 – 66.1)                                          | 55.1 (97)<br>(47.7 – 62.3)                                   | 93.8<br>(89.2 – 96.5)    | 0.87<br>(0.80 – 0.95) |
| qPCRs on culture-enriched OP samples    | 22.0 (13)<br>(13.4 – 34.1)                                           | 25.4 (15)<br>(16.1 – 37.8)                                   | 98.0<br>(93.0 – 99.4)    | 0.95<br>(0.88 – 1)    |

95%CI – 95% confidence interval;  $\kappa$  – Cohen’s Kappa where  $\leq 0$ , 0.01-0.20, 0.21-0.40, 0.41-0.60, 0.61-0.80,  $>0.81$  are interpreted as no agreement, none to slight, fair, moderate, substantial, and almost perfect agreement, respectively.
